# A comprehensive phylogeny of the bumble bees (*Bombus*)

S. A. CAMERON<sup>1\*</sup>, H. M. HINES<sup>1</sup> and P. H. WILLIAMS<sup>2</sup>

<sup>1</sup>Department of Entomology, 320 Morrill Hall, 505 S. Goodwin Avenue, University of Illinois, Urbana, IL 61801, USA

<sup>2</sup>Department of Entomology, Natural History Museum, South Kensington, London SW7 5BD, UK

Received 24 March 2006; accepted for publication 10 August 2006

Bumble bees (*Bombus* Latreille) occupy a wide diversity of habitats, from alpine meadows to lowland tropical forest, yet they appear to be similar in morphology throughout their range, suggesting that behavioural adaptations play a more important role in colonizing diverse habitats. Notwithstanding their structural homogeneity, bumble bees exhibit striking inter- and intraspecific variation in colour pattern, purportedly the outcome of mimetic evolution. A robust phylogeny of *Bombus* would provide the framework for elucidating the history of their wide biogeographical distribution and the evolution of behavioural and morphological adaptations, including colour pattern. However, morphological studies of bumble bees have discovered too few phylogenetically informative characters to reconstruct a robust phylogeny. Using DNA sequence data, we report the first nearly complete species phylogeny of bumble bees, including most of the 250 known species from the 38 currently recognized subgenera. Bayesian analysis of nuclear (opsin, EF-1 $\alpha$ , arginine kinase, PEPCK) and mitochondrial (16S) sequences results in a highly resolved and strongly supported phylogeny from base to tips, with clear-cut support for monophyly of most of the conventional morphology-based subgenera. Most subgenera fall into two distinct clades (*short-faced* and *long-faced*) associated broadly with differences in head morphology. Within the *short-faced* clade is a diverse *New World* clade, which includes nearly one-quarter of the currently recognized subgenera, many of which are restricted to higher elevations of Central and South America. The comprehensive phylogeny provides a firm foundation for reclassification and for evaluating character evolution in the bumble bees. © 2007 The Linnean Society of London, *Biological Journal of the Linnean Society*, 2007, 91, 161–188.

ADDITIONAL KEYWORDS: classification – corbiculate bees – nuclear genes.

## INTRODUCTION

Bumble bees (*Bombus* Latreille) are among the more familiar creatures inhabiting meadows, gardens and grasslands of the temperate world (Darwin, 1859: notes 1854–1861, translated by Freeman, 1968; Sladen, 1912). Robust and vividly coloured, they emerge from hibernation in early Spring in far northerly latitudes, feeding from the earliest willow blossoms before the snows have fully melted. Thermoregulatory mechanisms maintain their body temperature high above ambient in cold to freezing weather (Heinrich, 2004), allowing them full activity under conditions too extreme for other bees. Although they are most abundant in alpine and high-elevation

grassland habitats of the northern temperate zone, they range widely from Greenland to the Amazon Basin, from sea level to altitudes of 5800 m in the Himalayas (Williams, 1985). Thus, bumble bees exploit a wide diversity of habitats, from alpine meadows to lowland tropical forest (Sakagami, 1976). Nonetheless, they appear similar in morphology throughout their range (Michener, 1990; Williams, 1998), suggesting that ecological opportunity and behavioural adaptations play an important role in colonizing diverse habitats (Sakagami, 1976; Cameron & Whitfield, 1996; Dornhaus & Cameron, 2003; Dornhaus & Chittka, 2004). For example, temperate species initiate colonies annually from a single queen, whereas the tropical species appear at least facultatively perennial (Sakagami, Akahira & Zucchi, 1967; Olesen, 1989) and even exhibit polygyny (Zucchi, 1973; Cameron & Jost, 1998).

\*Corresponding author. E-mail: scameron@life.uiuc.edu

Despite the apparent constraint on structural diversity, bumble bees display striking inter- and intraspecific variation in colour pattern across their range (Sladen, 1912; Skorikov, 1931; Reinig, 1935, 1939; Tkalců, 1968, 1974, 1989; Williams, 1991, 1998), purportedly the outcome of mimetic evolution (Plowright & Owen, 1980). Not only are *Bombus* predisposed to converge sympatrically on similar colour patterns (Williams, 2007), but other insects mimic the *Bombus* patterns (Evans & Waldbauer, 1982), thus providing excellent opportunities to examine the influence of natural selection on the generation of variation among Müllerian (Plowright & Owen, 1980) and Batesian (Waldbauer, Sternberg & Maier, 1977; Evans & Waldbauer, 1982) mimics. Elucidating the evolution of diversity requires knowledge of the historical pattern of variation, which, in turn, provides unique insights into evolutionary processes underlying the pattern of variation. A robust phylogeny of *Bombus*, the goal of our research, is essential for inferring the history of their wide geographical distribution and for testing hypotheses of behavioural and mimetic adaptations.

#### CLASSIFICATION AND CURRENT STATUS OF *BOMBUS* PHYLOGENY

*Bombus* comprises the monotypic tribe Bombini, which together with Apini (honey bees), Meliponini (stingless bees), and Euglossini (orchid bees), constitutes the corbiculate bees, distinguished by the pollen-carrying structure (corbicula) on the hindleg. Their closest relatives, estimated from DNA sequences of multiple genes, are the stingless bees (Cameron, 1993, 2003; Mardulyn & Cameron, 1999; Cameron & Mardulyn, 2001, 2003; Lockhart & Cameron, 2001; Thompson & Oldroyd, 2004), although some morphological data (Roig-Alsina & Michener, 1993; Schultz, Engel & Ascher, 2001) place them as sister to honey bees + stingless bees.

Subsequent to Linnaeus (1758), approximately 2800 formal names, including synonyms, have been assigned to *Bombus* species and lower-ranking taxa (Williams, 1998). Today, we recognize approximately 250 species (Williams, 1998) assigned to 38 subgenera, primarily on the basis of male genitalia (Radoszkowski, 1884; Krüger, 1917; Skorikov, 1922; Richards, 1968). Many of the subgenera are monotypic (Richards, 1968; Williams, 1998) as a result of the distinctness of the male genitalia. The inflated number of species names was often the result of distinguishing species (and later, subspecies) by colour pattern. Numerous alternative classifications have been proposed (Milliron, 1961, 1971, 1973a, b; Tkalců, 1972) but largely disregarded.

Previous research on bumble bee phylogeny was restricted in scope and utility by either: (1) the appli-

cation of phenetic methods to infer phylogenetic relationships; (2) relatively sparse species sampling; or (3) insufficient numbers of informative characters. Examples of phenetic applications include the investigation by Ito (1985) of male genitalia and analyses of allozymes in regional taxa (Pekkarinen, 1979; Pekkarinen, Varvio-Aho & Pamilo, 1979; Obrecht & Scholl, 1981; Pamilo, Pekkarinen & Varvio, 1987). Williams (1985, 1994) applied parsimony to morphological data to address the higher-level relationships among subgenera, but the available characters led to considerable lack of subgeneric resolution. DNA analyses of relationships have been restricted to regional fauna (analyses of European taxa: Pedersen, 1996, 2002) or have included few species (assessment of *Pyrobombus* monophyly, 10–12 species overall: Koulianos, 1999; analysis of subgenera based on 19 species: Koulianos & Schmid-Hempel, 2000). Kawakita *et al.* (2003, 2004) estimated relationships among many of the subgenera using sequence data, but their sampling of only 76 species limits their ability to draw robust conclusions about the monophyly of groups and the evolution of traits.

Comprehensive molecular studies include examination of relationships within the large New World subgenus *Fervidobombus*, including DNA sequences and morphology, by Cameron & Williams (2003) and sequence analysis of 37 of the 43 recognized *Pyrobombus* species by Hines, Cameron & Williams (2006). In the present study, we report on the full hierarchy of *Bombus* relationships for most of the world fauna, including rare and potentially endangered species such as *Bombus franklini* and *Bombus occidentalis* (Thorp, 2005), exploiting the large number of characters available from DNA sequences collected from multiple genes.

## MATERIAL AND METHODS

### TAXA EXAMINED

A total of 218 *Bombus* taxa, representing most of the species from all 38 subgenera listed by Williams (1998), was sampled for analysis and their locality, collector, and voucher numbers recorded (Table 1). Intraspecific variants and taxa of controversial species status (Williams, 1998) were included when possible (Table 1). Outgroups were represented by exemplars selected from each of the other tribes of corbiculate bees (Table 1). Identification of taxa received from other collectors was verified by the authors before sequencing. Voucher specimens for all taxa used in the molecular investigation are deposited at the Illinois Natural History Survey, Urbana, Illinois. Additional vouchers from the morphological character examination are maintained by PHW at the Natural History Museum, London.

**Table 1.** *Bombus* and outgroup taxa examined, their collector, collection localities, voucher numbers, and GenBank accession numbers

| Subgenus                                               | Species                          | Collection locality         | Collector        | V.# | 16S      | EF-1α                 | Opsin                 | ArgK                  | PEPCK    |
|--------------------------------------------------------|----------------------------------|-----------------------------|------------------|-----|----------|-----------------------|-----------------------|-----------------------|----------|
| <b>Ag</b> <i>Alpigenobombus</i><br>Skorikov (6/5)      | <i>breviceps</i> Smith           | Chiang Mai, Thailand        | N. Warritt       | 190 | DQ787983 | DQ788165              | DQ788320              | DQ788408              | EF050915 |
|                                                        | <i>grahami</i> (Frison)          | Meigu, Sichuan, China       | T. Ya            | 273 | EF032347 | EF032347              | EF032389              | EF032408              | EF050916 |
|                                                        | <i>kashimirensis</i> Friese      | Hongyuan, Sichuan, China    | SC <i>et al.</i> | 121 | DQ788040 | DQ788215              | DQ788342              | DQ788447              | EF050913 |
|                                                        | <i>nobilis</i> Friese            | Qionglai Sh, Sichuan, China | SC <i>et al.</i> | 098 | DQ788071 | DQ788245              | AY739485 <sup>H</sup> | DQ788473              | EF050912 |
|                                                        | <i>wunfleni</i> Radoszkowski     | Obergurgi, Austria          | SC, JW           | 001 | DQ788137 | DQ788305              | AF493007 <sup>K</sup> | AF492873 <sup>K</sup> | EF050914 |
| <b>Al</b> <i>Alpinobombus</i><br>Skorikov (5/5)        | <i>alpinus</i> (Linnaeus)        | Gurgtal, Austria            | SC, JW           | 029 | DQ787963 | DQ788146              | AY739452 <sup>H</sup> | DQ788393              | EF050871 |
|                                                        | <i>balteatus</i> Dahlbom         | Lappland Co., Sweden        | B. Cederberg     | 039 | DQ787974 | DQ788157              | AY739455 <sup>H</sup> | DQ788402              | EF050870 |
|                                                        | <i>hyperboreus</i> Schönherr     | Dalarna Co., Sweden         | B. Cederberg     | 070 | DQ788028 | DQ788204              | AY739470 <sup>H</sup> | DQ788440              | EF050868 |
|                                                        | <i>neoboreus</i> Sladen          | Alaska, USA                 | A. Scholl        | 188 | DQ788068 | DQ788242              | AY739484 <sup>H</sup> | DQ788470              | EF050869 |
|                                                        | <i>polaris</i> Curtis            | Lappland Co., Sweden        | H. Elmquist      | 223 | DQ788083 | AF492970 <sup>K</sup> | AF493037 <sup>K</sup> | AF492903 <sup>K</sup> | EF050872 |
| <b>Bi</b> <i>Bombias</i> Robertson<br>(2/2)            | <i>auricomus</i> (Robertson)     | Illinois, USA               | H. Hines         | 062 | DQ787972 | DQ788154              | AY739454 <sup>H</sup> | AF492892 <sup>K</sup> | EF051014 |
|                                                        | <i>nevadensis</i> Cresson        | Alberta, Canada             | S. Cameron       | 139 | DQ788069 | DQ788243              | DQ788352              | DQ788471              | EF051015 |
| <b>Bo</b> <i>Bombus</i> Latreille<br>(10/10)           | <i>affinis</i> Cresson           | Illinois, USA               | H. Hines         | 167 | DQ787961 | DQ788144              | AY739451 <sup>H</sup> | DQ788391              | EF050860 |
|                                                        | <i>cryptarum</i> (Fabricius)*    | Erzincan Prov, Turkey       | PR <i>et al.</i> | 127 | DQ787995 | DQ788175              | AY739461 <sup>H</sup> | DQ788416              | EF050855 |
|                                                        | <i>franklini</i> (Frison)        | Oregon, USA                 | R. Thorp         | 256 | EF032345 | EF032366              | EF032385              | EF032403              | EF050861 |
|                                                        | <i>hypocrita</i> Pérez           | Kyushu, Japan               | S. Huang         | 123 | DQ788030 | DQ788206              | AF493023 <sup>K</sup> | AF492889 <sup>K</sup> | EF050864 |
|                                                        | <i>ignitus</i> Smith             | Beijing, China              | SC <i>et al.</i> | 096 | DQ788031 | DQ788207              | AF493032 <sup>K</sup> | AF492898 <sup>K</sup> | EF050866 |
|                                                        | <i>lucorum</i> (Linnaeus) ♂      | E. Pyrenees, France         | HH, PR           | 217 | DQ788051 | DQ788225              | AF493021 <sup>K</sup> | AF492887 <sup>K</sup> | EF050862 |
|                                                        | <i>moderatus</i> Cresson*        | Qionglai Sh, Sichuan, China | SC <i>et al.</i> | 184 | DQ788050 | DQ788224              | AY739479 <sup>H</sup> | DQ788456              | EF050863 |
|                                                        | <i>occidentalis</i> Greene*      | Alberta, Canada             | S. Cameron       | 163 | DQ788062 | DQ788236              | AY739481 <sup>H</sup> | DQ788464              | EF050856 |
|                                                        | <i>patagiatus</i> Nylander       | New Mexico, USA             | SC, JW           | 025 | DQ788074 | DQ788248              | AY739486 <sup>H</sup> | DQ788476              | EF050858 |
|                                                        | <i>sporadicus</i> Nylander       | Montana, USA                | S. Garner        | 026 | DQ788074 | DQ788248              | AY739486 <sup>H</sup> | DQ788476              | EF050858 |
| <b>Br</b> <i>Brachycephalibombus</i><br>Williams (2/1) | <i>baeri</i> Vachal ♂            | Hongyuan, Sichuan, China    | SC <i>et al.</i> | 111 | DQ788078 | DQ788252              | AF493020 <sup>K</sup> | AF492886 <sup>K</sup> | EF050857 |
|                                                        | <i>coccineus</i> Friese          | Lappland Co., Sweden        | B. Cederberg     | 193 | DQ788108 | DQ788279              | AY739491 <sup>H</sup> | DQ788501              | EF050867 |
|                                                        | <i>terrestris</i> (Linnaeus) ♂   | San Quirico, Italy          | SC, JW           | 003 | DQ788118 | DQ788288              | AF493022 <sup>K</sup> | AF492888 <sup>K</sup> | EF050865 |
|                                                        | <i>terricola</i> Kirby ♂         | Ontario, Canada             | J. Whitfield     | 205 | DQ788119 | DQ788289              | AF493019 <sup>K</sup> | AF492885 <sup>K</sup> | EF050859 |
|                                                        | <i>tunicatus</i> Smith ♂         | Uttaranchal, India          | M.Saini          | 248 | DQ788124 | DQ788289              | AF493019 <sup>K</sup> | AF492885 <sup>K</sup> | EF050859 |
| <b>Ce</b> <i>Coccinobombus</i><br>Skorikov (2/2)       | <i>brachycephalus</i> Handlirsch | Jalisco, Mexico             | F. Noguera       | 030 | DQ787982 | DQ788163              | DQ788319              | DQ788407              | EF050889 |
|                                                        | <i>baeri</i> Vachal ♂            | Guerrero, Mexico            | H. Hines         | 230 | DQ787982 | DQ788163              | DQ788319              | DQ788407              | EF050889 |
|                                                        | <i>coccineus</i> Friese          | Puno, Peru                  | J. Arcas         | 174 | DQ787973 | DQ788156              | DQ788317              | DQ788401              | EF050886 |
| <b>Cf</b> <i>Confusibombus</i><br>Ball (1/1)           | <i>confusus</i> Schenck ♂        | Huarochiri, Peru            | C. Rasmussen     | 137 | DQ787991 | DQ788172              | DQ788323              | DQ788413              | EF050885 |
|                                                        | <i>confusus</i> Schenck ♂        | Dorres, France              | HH, PR           | 083 | DQ787992 | DQ788173              | DQ788324              | DQ788414              | EF051016 |
| <b>Cr</b> <i>Crotchiibombus</i><br>Franklin (1/1)      | <i>crotchii</i> Cresson          | California, USA             | D. Zungri        | 071 | DQ787994 | AF492973              | AF493040 <sup>K</sup> | AF492906 <sup>K</sup> | EF050882 |

Table 1. Continued

| Subgenus                                            | Species                           | Collection locality         | Collector        | V.#                   | 16S                   | EF-1 $\alpha$         | Opsin                 | ArgK                  | PEPCK    |
|-----------------------------------------------------|-----------------------------------|-----------------------------|------------------|-----------------------|-----------------------|-----------------------|-----------------------|-----------------------|----------|
| <b>Cu</b> <i>Cullumanobombus</i><br>Vogt (4/3)      | <i>apollineus</i> Skorikov*       | Erzurum Prov., Turkey       | PR <i>et al.</i> | 084                   | DQ787964              | DQ788147              | DQ788313              | DQ788394              | EF050890 |
|                                                     | <i>rufocinctus</i> Cresson        | Alberta, Canada             | A. Scholl        | 186                   | DQ788097              | DQ788268              | AF493034 <sup>K</sup> | AF492900 <sup>K</sup> | EF050892 |
|                                                     | <i>semenoviellus</i> Skorikov     | Brandenburg, Germany        | B. Cederberg     | 236                   | DQ788101              | DQ788271              | DQ788369              | DQ788494              | EF050891 |
| <b>Ds</b> <i>Dasybombus</i><br>Laboug & Ayala (2/2) | <i>maegregori</i> Laboug & Ayala  | Guerrero, Mexico            | R. Ayala         | 231                   | DQ788053              | DQ788226              | DQ788347              | DQ788457              | EF050881 |
|                                                     | <i>handlirshi</i> Friese          | Pasco, Peru                 | D. Takiya        | 132                   | DQ788021              | DQ788197              | DQ788336              | DQ788435              | EF050887 |
| <b>Dv</b> <i>Diversobombus</i><br>Skorikov (4/4)    | <i>diversus</i> Smith             | Kyushu, Japan               | S. Huang         | 120                   | DQ788000              | AF492961 <sup>K</sup> | AF493028 <sup>K</sup> | AF492894 <sup>K</sup> | EF051010 |
|                                                     | <i>longipes</i> Friese            | Qionglai Sh, Sichuan, China | SC <i>et al.</i> | 194                   | DQ788049              | DQ788223              | DQ788346              | DQ788455              | EF051009 |
|                                                     | <i>trifasciatus</i> Smith         | Himachal Pradesh, India     | D. Johnson       | 015                   | DQ788122              | AF492918 <sup>K</sup> | AF492985 <sup>K</sup> | AF492851 <sup>K</sup> | EF051007 |
|                                                     | <i>ussurensis</i> Radoszkowski    | S. Korea, Mulan Valley      | P. Tripotin      | 130                   | AF364829 <sup>B</sup> | AF492919 <sup>K</sup> | AF492986 <sup>K</sup> | AF492852 <sup>K</sup> | EF051008 |
|                                                     | <i>wilemani</i> Cockerell*        | Meifang, Taiwan             | H. Townes        | 182                   | DQ788135              |                       |                       |                       |          |
|                                                     | <i>persicus</i> Radoszkowski      | Kars Prov., Turkey          | PR <i>et al.</i> | 054                   | DQ788080              | DQ788255              | DQ788358              | DQ788480              | EF050935 |
| <b>Ev</b> <i>Eversmannibombus</i><br>Skorikov (1/1) | <i>exil</i> (Skorikov)            | Hövsgöl Nuur, Mongolia      | NHM              | 232                   | DQ788004              | DQ788185              | DQ788330              | DQ788425              | EF050962 |
| <b>Fv</b> <i>Fervidobombus</i><br>Skorikov (19/18)  | <i>atratus</i> Franklin           | Ribeirão Preto, Brazil      | R. Zucchi        | 305                   | AY268398 <sup>C</sup> | DQ788152              | AY268376 <sup>C</sup> | DQ788398              | EF050943 |
|                                                     | <i>bellicosus</i> Smith ♂         | Buenos Aires, Argentina     | A. Roig          | 221                   | AY268399 <sup>C</sup> | DQ788159              | AY268377 <sup>C</sup> | DQ788404              | EF050956 |
|                                                     | <i>brasiliensis</i> Lepelletier   | Paraná, Brazil              | La Roca          | 219                   | AY268400 <sup>C</sup> | DQ788164              | AY268378 <sup>C</sup> |                       | EF050950 |
|                                                     | <i>californicus</i> Smith*        | Alberta, Canada             | R. Owen          | 306                   | AY268401 <sup>C</sup> | DQ788167              | AY268379 <sup>C</sup> | DQ788410              | EF050957 |
|                                                     | <i>dahlbomii</i> Guérin-Ménéville | Arauco Prov, Chile          | C. Carlton       | 016                   | DQ787996              | AF492931 <sup>K</sup> | AF492998 <sup>K</sup> | AF492864 <sup>K</sup> | EF050940 |
|                                                     | <i>digressus</i> (Milliron)       | R. Grande de Orosí, Mexico  | R. Delgado       | 307                   | AY268403 <sup>C</sup> | DQ788178              | AY268381 <sup>C</sup> | DQ788418              | EF050959 |
|                                                     | <i>diligens</i> Smith             | Jalisco, Mexico             | F. Noguera       | 171                   | AY268404 <sup>C</sup> | DQ788179              | AY268382 <sup>C</sup> | DQ788419              | EF050955 |
|                                                     | <i>excellens</i> Smith            | Aragua, Venezuela           | J. Garc'a        | 308                   | AY268405 <sup>C</sup> | DQ788184              | AY268383 <sup>C</sup> | DQ788424              | EF050942 |
|                                                     | <i>fervidus</i> (Fabricius)       | Missouri, USA               | S. Cameron       | 309                   | AY268406 <sup>C</sup> | AF492930 <sup>K</sup> | AF492997 <sup>K</sup> | AF492863 <sup>K</sup> | EF050951 |
|                                                     | <i>medius</i> Cresson             | Chiapas, Mexico             | RA, RB           | 222                   | AY268407 <sup>C</sup> | DQ788228              | AY268385 <sup>C</sup> | DQ788459              | EF050958 |
|                                                     | <i>mexicanus</i> Cresson          | Chiapas, Mexico             | RA, RB           | 220                   | AY268408 <sup>C</sup> | DQ788232              | AY268386 <sup>C</sup> | DQ788461              | EF050952 |
|                                                     | <i>morio</i> (Swederus)           | Porto Alegre, Argentina     | D. Wittman       | 310                   | AY268409 <sup>C</sup> | DQ788239              | AY268387 <sup>C</sup> | DQ788467              | EF050941 |
|                                                     | <i>opifex</i> Smith               | Puno, Peru                  | J. Arcas         | 175                   | DQ788075              | DQ788249              | DQ788356              | DQ788477              | EF050954 |
|                                                     | <i>pensylvanicus</i> (DeGeer)     | Missouri, USA               | S. Cameron       | 317                   | EF032352              | EF032374              | EF032392              | EF032411              | EF050948 |
| <i>pullatus</i> Franklin                            | Missouri, USA                     | S. Cameron                  | 311              | EF032351              | EF032375              | EF032393              | EF032412              | EF050949              |          |
| <i>sonorus</i> Say*                                 | Ptilla, Costa Rica                | S. Cameron                  | 312              | AY268411 <sup>C</sup> | DQ788261              | AY268389 <sup>C</sup> | DQ788486              | EF050945              |          |
| <i>steindachneri</i> Handlirsch                     | Arizona, USA                      | T. Griswold                 | 051              | DQ822475              | DQ788277              | EF032394              | DQ788500              | EF050946              |          |
| <i>transversalis</i> (Olivier)                      | Mexico                            | S. Cameron                  | 318              | AY268412 <sup>C</sup> | EF032376              | AY268390 <sup>C</sup> | EF032410              | EF050947              |          |
| <i>trinominatus</i> Dalla Torre                     | Morelos, Mexico                   | R. Ayala                    | 313              | AY268413 <sup>C</sup> | DQ788280              | AY268391 <sup>C</sup> | DQ788502              | EF050953              |          |
| <i>weisi</i> Friese                                 | Madre de Dios, Peru               | S. Cameron                  | 314              | AY268414 <sup>C</sup> | DQ788291              | AY268392 <sup>C</sup> | DQ788510              | EF050944              |          |
| <i>festivus</i> Smith                               | Oaxaca, Mexico                    | H. Hines                    | 229              | DQ788123              | DQ788292              | DQ788379              | DQ788511              | EF050960              |          |
| <i>festivobombus</i> Tkalcü                         | Jalisco, Mexico                   | F. Noguera                  | 315              | AY268415 <sup>C</sup> | DQ788303              | AY268393 <sup>C</sup> | DQ788520              | EF050961              |          |
| (1/1)                                               |                                   | Guizhou Prov., China        | M. Yun           | 032                   | DQ788007              | DQ788187              |                       |                       |          |
|                                                     |                                   | Qionglai Sh, Sichuan, China | SC <i>et al.</i> | 104                   |                       |                       | AY739465 <sup>H</sup> | DQ788427              | EF050910 |

|                                                      |                                         |                             |                  |     |                       |                       |                       |                       |          |
|------------------------------------------------------|-----------------------------------------|-----------------------------|------------------|-----|-----------------------|-----------------------|-----------------------|-----------------------|----------|
| <b>Fr</b> <i>Fraternobombus</i><br>Skorikov (1/1)    | <i>fraternus</i> (Smith)                | Illinois, USA               | H. Hines         | 183 | DQ788013              | AF492974 <sup>k</sup> | AF493041 <sup>k</sup> | AF492907 <sup>k</sup> | EF050884 |
| <b>Fn</b> <i>Funebribombus</i><br>Skorikov (1/1)     | <i>funebris</i> Smith                   | Abancay, Peru               | C. Rasmussen     | 128 | DQ788016              | DQ788194              | DQ788334              | DQ788433              | EF050883 |
| <b>Kl</b> <i>Kallobombus</i> Dalla<br>Torre (1/1)    | <i>soroensis</i> (Fabricius)            | E. Pyrenees, France         | HH, PR           | 136 | DQ788107              | DQ788278              | AF493008 <sup>k</sup> | AF492874 <sup>k</sup> | EF051013 |
| <b>Ls</b> <i>Laesobombus</i> Krüger<br>(1/1)         | <i>laesus</i> Morawitz                  | Kars Prov., Turkey          | PR <i>et al.</i> | 052 | DQ788044              | DQ788218              | DQ788344              | DQ788451              | EF050936 |
| <b>Mg</b> <i>Megabombus</i> Dalla<br>Torre (14/12)   | <i>argillaceus</i> (Scopoli)            | Kayseri Prov., Turkey       | PR <i>et al.</i> | 058 | DQ787967              | DQ788150              | AY739453 <sup>h</sup> | DQ788396              | EF051001 |
|                                                      | <i>consobrinus</i> Dahlbom ♂            | Altai Mts, Kazakhstan       | P. Mardulyn      | 261 | EF032354              | EF032379              | AY267150 <sup>k</sup> | AY267166 <sup>k</sup> | EF050994 |
|                                                      | <i>gerstaeckeri</i> Morawitz            | E. Pyrenees, France         | HH, PR           | 065 | DQ788017              | DQ788195              | DQ788335              | DQ788434              | EF051003 |
|                                                      | <i>hortorum</i> (Linnaeus)              | Toscana, Italy              | PR <i>et al.</i> | 005 | DQ788024              | DQ788200              | AF492987 <sup>k</sup> | AF492853 <sup>k</sup> | EF050999 |
|                                                      | <i>koreanus</i> (Skorikov)              | Kangwondo, S. Korea         | P. Tripotin      | 277 | EF032355              | AF492969 <sup>k</sup> | AF493036 <sup>k</sup> | AF492902 <sup>k</sup> | EF050995 |
|                                                      | <i>portkinsky</i> Radoszkowski          | Artvin Prov., Turkey        | PR <i>et al.</i> | 072 | DQ788085              | DQ788259              | DQ788361              | DQ788484              | EF051000 |
|                                                      | <i>religiosus</i> (Frison)              | Qionglai Sh, Sichuan, China | SC <i>et al.</i> | 141 | DQ788091              | DQ788264              | DQ788364              | DQ788489              | EF050998 |
|                                                      | <i>ruderatus</i> (Fabricius)            | Valdivia Prov., Chile       | C. Carlson       | 018 | DQ788096              | AF492977 <sup>k</sup> | AF493044 <sup>k</sup> | AF492910 <sup>k</sup> | EF051002 |
|                                                      | <i>securus</i> (Frison)                 | Qionglai Sh, Sichuan, China | SC <i>et al.</i> | 142 | DQ788100              | DQ788270              | DQ788368              | DQ788493              | EF050997 |
|                                                      | <i>supremus</i> Morawitz                | Qionglai Sh, Sichuan, China | SC <i>et al.</i> | 101 | DQ788112              | DQ788284              | DQ788375              | DQ788505              | EF051004 |
|                                                      | <i>sushini</i> (Skorikov)               | Hongyuan, Sichuan, China    | SC <i>et al.</i> | 143 | DQ788113              | AF492921 <sup>k</sup> | AF492988 <sup>k</sup> | AF492854 <sup>k</sup> | EF050996 |
|                                                      | <i>tichenkoi</i> (Skorikov)             |                             |                  |     |                       | AF492922 <sup>k</sup> | AF492989 <sup>k</sup> | AF492855 <sup>k</sup> |          |
| <b>Ml</b> <i>Melanobombus</i> Dalla<br>Torre (14/10) | <i>alagezanianus</i> Reing <sup>*</sup> | Artvin Prov., Turkey        | PR <i>et al.</i> | 085 | DQ787962              | DQ788145              | DQ788312              | DQ788392              | EF050903 |
|                                                      | <i>ermosellus</i> (Ozbek) <sup>*</sup>  | Artvin Prov., Turkey        | PR <i>et al.</i> | 126 | DQ788003              | DQ788183              | AY739463 <sup>h</sup> | DQ788423              | EF050899 |
|                                                      | <i>formosellus</i> (Frison)             |                             |                  |     |                       | AF492939 <sup>k</sup> | AF493006 <sup>k</sup> | AF492872 <sup>k</sup> |          |
|                                                      | <i>friseanus</i> Skorikov               | Qionglai Sh, Sichuan, China | SC <i>et al.</i> | 105 | DQ788015              | DQ788193              | AY739467 <sup>h</sup> | DQ788432              | EF050906 |
|                                                      | <i>incertus</i> Morawitz                | Erzurum Prov., Turkey       | PR <i>et al.</i> | 086 | DQ788035              | DQ788211              | DQ788341              | DQ788443              | EF050901 |
|                                                      | <i>kertensis</i> Morawitz               | Hongyuan, Sichuan, China    | SC <i>et al.</i> | 114 | DQ788041              | DQ788216              | AY739474 <sup>h</sup> | DQ788448              | EF050904 |
|                                                      | <i>ladakhensis</i> Richards             | Aba, Sichuan, China         | SC <i>et al.</i> | 158 | DQ788043              | AY739575 <sup>h</sup> | AY739475 <sup>h</sup> | DQ788450              | EF050905 |
|                                                      | <i>lapidarius</i> (Linnaeus) ♂          | San Quirico, Italy          | SC, JW           | 006 | DQ788045              | DQ788219              | AF493005 <sup>k</sup> | AF492871 <sup>k</sup> | EF050902 |
|                                                      | <i>minitatus</i> Bingham                | Himachal Pradesh, India     | M. Saini         | 244 | DQ788059              | DQ788233              | DQ788348              | DQ788462              | EF050908 |
|                                                      | <i>rufofasciatus</i> Smith              | Hongyuan, Sichuan, China    | SC <i>et al.</i> | 133 | DQ788098              | DQ788269              | AY739489 <sup>h</sup> | DQ788492              | EF050907 |
|                                                      | <i>sicheli</i> Radoszkowski             | Obergurgl, Austria          | SC, JW           | 034 | DQ788103              | DQ788273              | DQ788371              | DQ788496              | EF050900 |
|                                                      | <i>simillimus</i> Smith ♂               | Himachal Pradesh, India     | M. Saini         | 243 | DQ788104              | DQ788274              | DQ788372              | DQ788497              | EF050909 |
| <b>Md</b> <i>Mendacibombus</i><br>Skorikov (12/7)    | <i>avinoviellus</i> (Skorikov) ♂        | Himachal Pradesh, India     | M. Saini         | 242 | AY268416 <sup>c</sup> | DQ788155              | AY268416 <sup>c</sup> | DQ788400              | EF051020 |
|                                                      | <i>convexus</i> Wang                    | Qionglai Sh, Sichuan, China | SC <i>et al.</i> | 109 | DQ787993              | DQ788174              | DQ788325              | DQ788415              | EF051021 |
|                                                      | <i>defector</i> Skorikov                |                             |                  |     |                       | AF492958 <sup>k</sup> | AF493025 <sup>k</sup> | AF492891 <sup>k</sup> |          |
|                                                      | <i>handlirschianus</i> Vogt             | Artvin Prov., Turkey        | PR <i>et al.</i> | 087 | DQ788022              | DQ788198              | DQ788337              | DQ788436              | EF051017 |
|                                                      | <i>mendax</i> Gerstaecker               | Gurgltal, Austria           | SC, JW           | 019 | DQ788057              | AY739584 <sup>h</sup> | AF493024 <sup>k</sup> | AF492890 <sup>k</sup> | EF051019 |
|                                                      | <i>shaposhnikovii</i> Skorikov          | Artvin Prov., Turkey        | PR <i>et al.</i> | 099 | DQ788102              | DQ788272              | DQ788370              | DQ788495              | EF051018 |
|                                                      | <i>waltoni</i> Cockerell                | Qionglai Sh, Sichuan, China | SC <i>et al.</i> | 102 | DQ788134              | DQ788302              | DQ788385              | DQ788519              | EF051022 |
| <b>Mc</b> <i>Mucidobombus</i><br>Krüger (1/1)        | <i>mucidus</i> Krüger                   | E. Pyrenees, France         | PR <i>et al.</i> | 059 | DQ788066              | AF492935 <sup>k</sup> | AF493002 <sup>k</sup> | AF492868 <sup>k</sup> | EF050934 |

Table 1. Continued

| Subgenus                                        | Species                                | Collection locality         | Collector        | V.#                   | 16S                   | EF-1 $\alpha$         | Opsin                 | ArgK                  | PFCK     |
|-------------------------------------------------|----------------------------------------|-----------------------------|------------------|-----------------------|-----------------------|-----------------------|-----------------------|-----------------------|----------|
| <b>Ob</b> <i>Obertobombus</i> Reimig (2/1)      | <i>oberti</i> Morawitz                 | Mt. Kailas, Tibet           | T. Bardell       | 234                   | DQ788073              | DQ788247              | DQ788355              | DQ788475              | EF050898 |
|                                                 | <i>funerarius</i> Smith                | Luojishan, Sichuan, China   | P. Williams      | 270                   | EF032356              | EF032378              | EF032396              | EF032415              | EF051012 |
|                                                 | <i>haemorrhoidalis</i> Smith           | Chiang Mai Prov., Thailand  | N. Warrit        | 191                   | DQ788020              | AF492935 <sup>k</sup> | AF493002 <sup>k</sup> | AF492868 <sup>k</sup> | EF051011 |
| <b>Pe</b> <i>Pressibombus</i> Frison (1/1)      | <i>pressus</i> (Frison)                | Uttaranchal, India          | M. Saini         | 239                   | DQ788088              | EF032368              |                       |                       | EF050837 |
| <b>Ps</b> <i>Psithyrus</i> Lepeletier (29/21)   | <i>ashtoni</i> (Cresson) ♂             | Ottawa, Canada              | J. Whitfield     | 164                   | DQ787969              | AF492983 <sup>k</sup> | AF493050 <sup>k</sup> | AF492916 <sup>k</sup> | EF050978 |
|                                                 | <i>barbutellus</i> (Kirby) ♂           | Uppland Co., Sweden         | B. Cederberg     | 073                   | DQ787975              | DQ788158              | DQ788318              | DQ788403              | EF050972 |
|                                                 | <i>bohemicus</i> (Seidl) ♂             | E. Pyrenees, France         | PR <i>et al.</i> | 055                   | DQ787980              | AF492925 <sup>k</sup> | AF492992 <sup>k</sup> | AF492858 <sup>k</sup> | EF050979 |
|                                                 | <i>campestris</i> (Panzer)             | Dalarna Co., Sweden         | B. Cederberg     | 040                   | DQ787986              | AF492927 <sup>k</sup> | AF492994 <sup>k</sup> | AF492860 <sup>k</sup> | EF050974 |
|                                                 | <i>chinensis</i> (Morawitz) ♂          | Qionglai Sh, Sichuan, China | SC <i>et al.</i> | 152                   | DQ787988              | DQ788170              | DQ788321              | DQ788412              | EF050982 |
|                                                 | <i>citrinus</i> (Smith) ♂              | Virginia, USA               | A. Deans         | 170                   | DQ787990              | DQ788171              | DQ788322              | AY267169 <sup>k</sup> | EF050975 |
|                                                 | <i>corcanus</i> (Yasumatsu)            |                             |                  |                       | AF364830 <sup>b</sup> |                       |                       |                       |          |
|                                                 | <i>cornutus</i> (Frison) ♂             | Ningnan, Sichuan, China     | T. Ya            | 271                   | EF032353              | EF032377              | EF032395              | EF032413              | EF050984 |
|                                                 | <i>fermaldae</i> (Franklin) ♂          | New Mexico, USA             | SC, JW           | 088                   | DQ788006              | AF492926 <sup>k</sup> | AF492993 <sup>k</sup> | AF492859 <sup>k</sup> | EF050969 |
|                                                 | <i>flavidus</i> Eversmann ♂            | Lappland Co., Sweden        | B. Cederberg     | 041                   | DQ788010              | DQ788189              | DQ788332              | DQ788429              | EF050970 |
|                                                 | <i>insularis</i> (Smith)               | California, USA             | H. Hines         | 162                   | DQ788038              | AF492975 <sup>k</sup> | AF493042 <sup>k</sup> | AF492908 <sup>k</sup> | EF050976 |
|                                                 | <i>maxillosus</i> Klug ♂               | Kayseri Prov., Turkey       | PR <i>et al.</i> | 074                   | DQ788054              | DQ788227              | AY739480 <sup>h</sup> | DQ788458              | EF050973 |
|                                                 | <i>norvegicus</i> (Sparre-Schneider) ♂ | Dalarna Co., Sweden         | B. Cederberg     | 089                   | DQ788072              | DQ788246              | DQ788354              | DQ788474              | EF050971 |
|                                                 | <i>quadricolor</i> (Lepeletier) ♂      | Uppland Co., Sweden         | B. Cederberg     | 090                   | DQ788090              | DQ788263              | DQ788363              | DQ788488              | EF050966 |
|                                                 | <i>rupestris</i> (Fabricius)           | Uppland Co., Sweden         | B. Cederberg     | 009                   | DQ788099              | AF492928 <sup>k</sup> | AF492995 <sup>k</sup> | AF492861 <sup>k</sup> | EF050983 |
|                                                 | <i>skorikovi</i> (Popov) ♂             | Aba, Sichuan, China         | SC <i>et al.</i> | 159                   | DQ788106              | DQ788276              | DQ788373              | DQ788499              | EF050968 |
|                                                 | <i>suckleyi</i> Greene                 | Colorado, USA               | SC, JW           | 091                   | DQ788110              | DQ788282              | DQ788374              | DQ788503              | EF050981 |
| <i>sylvestris</i> (Lepeletier)                  | Uppland Co., Sweden                    | B. Cederberg                | 020              | DQ788115              | DQ788286              | DQ788377              | DQ788507              | EF050967              |          |
| <i>tibetanus</i> (Morawitz) ♂                   | Min Shan, Sichuan, China               | SC <i>et al.</i>            | 134              | DQ788120              | DQ788290              | DQ788378              | DQ788509              | EF050985              |          |
| <i>variabilis</i> (Cresson) ♂                   | Missouri, USA                          | S. Cameron                  | 316              | AY268419 <sup>c</sup> | DQ788295              | AY268397 <sup>c</sup> | DQ788513              | EF050977              |          |
| <i>vestalis</i> (Geoffroy) ♂                    | Kent, England                          | P. Williams                 | 169              | DQ788128              | DQ788297              | AY739495 <sup>h</sup> | DQ788515              | EF050980              |          |
| <b>Pr</b> <i>Pyrobombus</i> Dalla Torre (43/40) | <i>alboanalis</i> Franklin*            | Alaska, USA                 | SAC, JBW         | 257                   | EF032343              | EF032360              | EF032380              | EF032398              | EF050813 |
|                                                 | <i>ardens</i> Smith ♂                  | Dae-Dong, S. Korea          | D. Kim           | 131                   | DQ787966              | DQ788149              | AF493031 <sup>k</sup> | AF492897 <sup>k</sup> | EF050823 |
|                                                 | <i>avanus</i> (Skorikov)*              | Luojishan, Sichuan, China   | P. Williams      | 272                   | EF032344              | EF032365              | EF032384              | EF032402              | EF050830 |
|                                                 | <i>beaticola</i> (Tkalci)              |                             |                  |                       | AF492963 <sup>k</sup> | AF493030 <sup>k</sup> | AF493030 <sup>k</sup> | AF492896 <sup>k</sup> |          |
|                                                 | <i>bifarius</i> Cresson                | New Mexico, USA             | M. Hauser        | 208                   | DQ787977              | DQ788160              | AF493010 <sup>k</sup> | AF492876 <sup>k</sup> | EF050838 |
|                                                 | <i>bimaculatus</i> Cresson             | Arkansas, USA               | S. Cameron       | 218                   | DQ787978              | DQ788161              | AY739456 <sup>h</sup> | DQ788405              | EF050847 |
|                                                 | <i>biroi</i> Vogt                      | Ketmen Mts., Kazakhstan     | M. Hauser        | 210                   | DQ787979              | DQ788162              | AY739457 <sup>h</sup> | DQ788406              | EF050825 |
|                                                 | <i>brodmannicus</i> Vogt               | Artvin Prov., Turkey        | PR <i>et al.</i> | 077                   | DQ787984              | DQ788166              | AY739458 <sup>c</sup> | DQ788409              | EF050818 |
|                                                 | <i>caliginosus</i> (Frison)            | California, USA             | H. Hines         | 150                   | DQ787985              | DQ788168              | AF493035 <sup>k</sup> | AF492901 <sup>k</sup> | EF050853 |
|                                                 | <i>centralis</i> Cresson               | Washington, USA             | J. Whitfield     | 146                   | DQ787987              | DQ788169              | AY739459 <sup>c</sup> | DQ788411              | EF050852 |

|                                  |                             |                  |     |          |                       |                       |                       |          |
|----------------------------------|-----------------------------|------------------|-----|----------|-----------------------|-----------------------|-----------------------|----------|
| <i>cingulatus</i> Wahlberg       | Lappi, Finland              | P. Rasmont       | 212 | DQ787989 | AF492948 <sup>K</sup> | AF493015 <sup>K</sup> | AF492881 <sup>K</sup> | EF050812 |
| <i>ephippiatus</i> Say           | Oaxaca, Mexico              | R. Ayala         | 042 | DQ788002 |                       |                       |                       |          |
| <i>flavescens</i> (Smith)        | Chiapas, Mexico             | M. Guzman        | 198 | DQ788009 | AF492950 <sup>K</sup> | AY739462 <sup>H</sup> | DQ788422              | EF050844 |
| <i>flavifrons</i> Cresson ♂      | Mei-fang, Taiwan            | H. Townes        | 181 | DQ788011 | DQ788190              | AF493017 <sup>K</sup> | AF492883 <sup>K</sup> | EF050824 |
| <i>frigidus</i> Smith            | California, USA             | J. Whitfield     | 095 | DQ788014 | DQ788192              | AF493016 <sup>K</sup> | AF492882 <sup>K</sup> | EF050850 |
| <i>haematurus</i> Kriechbaumer ♂ | Alaska, USA                 | A. Scholl        | 185 | DQ788011 | DQ788192              | AY739466 <sup>H</sup> | DQ788431              | EF050811 |
| <i>huntii</i> Greene             | Trabzon Prov., Turkey       | P. Rasmont       | 211 | DQ788019 | EF032364              |                       |                       | EF050829 |
| <i>hypnorum</i> (Linnaeus)       | Washington, USA             | J. Whitfield     | 151 | DQ788027 | DQ788203              | AF493045 <sup>K</sup> | AF492911 <sup>K</sup> | EF050840 |
| <i>impatiens</i> Cresson         | Klösterle, Austria          | SC, JW           | 078 | DQ788029 | DQ788205              | AF493013 <sup>K</sup> | AF492879 <sup>K</sup> | EF050826 |
| <i>infirmus</i> (Tkalci) ♂       | Qionglai Sh, Sichuan, China | SC <i>et al.</i> | 207 | EF032359 | EF032363              | EF032383              | EF032401              | EF050827 |
| <i>infrequens</i> (Tkalci)*      | Illinois, USA               | H. Hines         | 060 | DQ788033 | DQ788209              | AF493009 <sup>K</sup> | AF492875 <sup>K</sup> | EF050842 |
| <i>jonellus</i> (Kirby)          | Qionglai Sh, Sichuan, China | SC <i>et al.</i> | 157 | DQ788036 | DQ788212              | AY739471 <sup>H</sup> | DQ788444              | EF050836 |
| <i>laponicus</i> (Fabricius)     | Qionglai Sh, Sichuan, China | SC <i>et al.</i> | 140 | DQ788037 | DQ788213              | AY739472 <sup>H</sup> | DQ788445              | EF050831 |
| <i>lenniscatus</i> Skorikov      | Lappland Co., Sweden        | B. Cederberg     | 079 | DQ788039 | DQ788214              | AY739473 <sup>H</sup> | DQ788446              | EF050814 |
| <i>lepidus</i> Skorikov          | Lappland Co., Sweden        | B. Cederberg     | 103 | DQ788046 | DQ788220              | DQ788345              | DQ788452              | EF050845 |
| <i>luteipes</i> Richards         | Qionglai Sh, Sichuan, China | SC <i>et al.</i> | 161 | DQ788047 | DQ788221              | AY739477 <sup>H</sup> | DQ788453              | EF050834 |
| <i>melanopygus</i> Nylander      | Pokhara, Nepal              | SC <i>et al.</i> | 155 | DQ788048 | DQ788222              | AY739478 <sup>H</sup> | DQ788454              | EF050835 |
| <i>mixtus</i> Cresson            | California, USA             | S. Martin        | 195 | DQ788052 |                       |                       |                       |          |
| <i>modestus</i> Eversmann        | Washington, USA             | H. Hines         | 215 | DQ788055 | DQ788229              | AF493011 <sup>K</sup> | AF492877 <sup>K</sup> | EF050849 |
| ♂                                | Washington, USA             | SC, JW           | 024 | DQ788060 | DQ788234              | AF493014 <sup>K</sup> | AF492880 <sup>K</sup> | EF050816 |
| <i>monticola</i> Smith           | Aba, Sichuan, China         | SC <i>et al.</i> | 160 | DQ788063 | DQ788237              | AY739482 <sup>H</sup> | DQ788465              | EF050820 |
| <i>parthenius</i> Richards       | S. Altai, Kazakhstan        | P. Mardulyn      | 238 | EF032358 | EF032362              | EF032382              | EF032400              | EF050821 |
| <i>perplexus</i> Cresson         | E. Pyrenees, France         | PR <i>et al.</i> | 176 | DQ788064 | DQ788238              | AY739483 <sup>H</sup> | DQ788466              | EF050848 |
| <i>picipes</i> Richards          | Himachal Pradesh, India     | M. Saini         | 241 | DQ788076 | DQ788250              | DQ788357              | DQ788478              | EF050832 |
| <i>pratorem</i> (Linnaeus)       | Ottawa, Canada              | J. Whitfield     | 166 | DQ788079 | DQ788254              | AF493012 <sup>K</sup> | AF492878 <sup>K</sup> | EF050828 |
| <i>pyrenaicus</i> Pérez          | Qionglai Sh, Sichuan, China | SC <i>et al.</i> | 180 | DQ788082 | DQ788257              | AY739487 <sup>H</sup> | DQ788482              | EF050833 |
| <i>sandersoni</i> Franklin       | Klösterle, Austria          | SC, JW           | 075 | DQ788087 | AF492966 <sup>K</sup> | AF493033 <sup>K</sup> | AF492899 <sup>K</sup> | EF050819 |
| <i>sithensis</i> Nylander        | Gurgltal, Austria           | SC, JW           | 035 | DQ788089 | DQ788262              | AY739488 <sup>H</sup> | DQ788487              | EF050822 |
| <i>sonani</i> (Frison)*          | Isle au Haut, Maine, USA    | SC, JW           | 255 | EF032346 | EF032361              | EF032381              | EF032399              | EF050815 |
| <i>sylvicola</i> Kirby ♂*        | California, USA             | H. Hines         | 144 | DQ788105 | DQ788275              | AY739490 <sup>H</sup> | DQ788498              | EF050817 |
| <i>ternarius</i> Say             | New Mexico, USA             | SC, JW           | 108 | DQ788116 | AF492951 <sup>K</sup> | AF493018 <sup>K</sup> | AF492884 <sup>K</sup> |          |
| <i>vagens</i> Smith              | Nova Scotia, Canada         | SC, JW           | 116 | DQ788117 | AF492979 <sup>K</sup> |                       | DQ788508              | EF050847 |
| <i>vandykei</i> (Frison)         | Wisconsin, USA              | J. Whitfield     | 044 | DQ788125 | DQ788293              | DQ788380              | DQ788512              | EF050839 |
| <i>vosnenskii</i> Radoszkowski ♂ | Washington, USA             | J. Whitfield     | 149 | DQ788126 | DQ788294              | AF493049 <sup>K</sup> | AF492915 <sup>K</sup> | EF050854 |
| <i>wilmattae</i> Cockerell*      | Washington, USA             | J. Whitfield     | 112 | DQ788133 | DQ788301              | AF493047 <sup>K</sup> | AF492913 <sup>K</sup> | EF050851 |
|                                  | Chiapas, Mexico             | R. Vandame       | 199 | DQ788136 | DQ788304              | AY739496 <sup>H</sup> | DQ788521              | EF050841 |

Table 1. Continued

| Subgenus                                              | Species                            | Collection locality         | Collector        | V.# | 16S      | EF-1 $\alpha$         | Opsin                 | ArgK                  | PFCK     |
|-------------------------------------------------------|------------------------------------|-----------------------------|------------------|-----|----------|-----------------------|-----------------------|-----------------------|----------|
| <b>Rh</b> <i>Rhodobombus</i> Dalla<br>Torre (3/3)     | <i>armeniacus</i> Radoszkowski     | Kayseri Prov., Turkey       | PR <i>et al.</i> | 080 | DQ787968 | DQ788151              | DQ788315              | DQ788397              | EF050937 |
|                                                       | <i>mesomelas</i> (Gerstaecker)     | Switzerland                 | C. Gerlach       | 037 | DQ788058 | DQ788231              | EF032390              | EF032414              | EF050938 |
|                                                       | <i>pomorum</i> (Panzer) ♂          | Erzincan Prov., Turkey      | PR <i>et al.</i> | 053 | DQ788084 | DQ788258              | DQ788360              | DQ788483              | EF050939 |
| <b>Rb</b> <i>Robustobombus</i><br>Skorikov (7/7)      | <i>ecuadorius</i> Meunier ♂        | Abancay, Peru               | C. Rasmussen     | 135 | DQ788001 | DQ788181              | DQ788329              | DQ788421              | EF050874 |
|                                                       | <i>hortulanus</i> Friese ♂         | Magdalena, Colombia         | J. Cantillo      | 200 | DQ788025 | DQ788201              | AY739468 <sup>H</sup> | DQ788438              | EF050875 |
|                                                       | <i>melaleucus</i> Handlirsch       | Oxapampa, Peru              | C. Rasmussen     | 173 | DQ787960 | DQ788143              | DQ788311              | DQ788460              | EF050876 |
|                                                       | <i>robustus</i> Smith              | Boyacá, Colombia            | S. Cameron       | 050 | DQ788093 | DQ788266              | DQ788366              | EF032405              | EF050877 |
|                                                       | <i>tucumanus</i> Vachal            | Tucumán, Argentina          | M. Lucia         | 276 | EF032349 | EF032367              | EF032386              | EF032404              | EF050873 |
|                                                       | <i>vogti</i> Friese* ♂             | Abancay, Peru               | C. Rasmussen     | 172 | DQ788130 | DQ788299              | DQ788383              | DQ788517              | EF050878 |
|                                                       | <i>volucelloides</i> Gribado*      | San Jose, Costa Rica        | P. Hanson        | 122 | DQ788131 | AY267133 <sup>K</sup> | AY267149 <sup>K</sup> | AY267165 <sup>K</sup> |          |
| <b>Rc</b> <i>Rubicundobombus</i><br>Skorikov (1/1)    | <i>rubicundus</i> Smith            | Cundinamarca, Colombia      | A. Perez         | 021 | DQ788094 |                       |                       | DQ788491              | EF050888 |
|                                                       | <i>eximius</i> Smith               | Boyacá, Colombia            | S. Cameron       | 202 |          | DQ788267              | DQ788367              | DQ788426              | EF050911 |
| <b>Rf</b> <i>Rufipedibombus</i><br>Skorikov (2/1)     |                                    | Alishan, Taiwan             | J. de Boer       | 049 | DQ788005 | DQ788186              | AY739464 <sup>C</sup> |                       |          |
|                                                       |                                    |                             |                  |     |          |                       |                       |                       |          |
| <b>Sx</b> <i>Senexibombus</i> Frison<br>(4/2)         | <i>bicoloratus</i> Smith           | Nantou, Taiwan              | C. Lin           | 225 | DQ787976 | AF492971 <sup>K</sup> | AF493038 <sup>K</sup> | AF492904 <sup>K</sup> | EF051005 |
|                                                       | <i>kulingensis</i> Cockerell       | Zhejiang Prov., China       | SC <i>et al.</i> | 097 | DQ788042 | DQ788217              | DQ788343              | DQ788449              | EF051006 |
| <b>Sp</b> <i>Separatobombus</i><br>Frison (2/2)       | <i>griseocollis</i> (DeGeer)       | Illinois, USA               | H. Hines         | 082 | DQ788018 | DQ788196              | AF493039 <sup>K</sup> | AF492905 <sup>K</sup> | EF050879 |
|                                                       | <i>morrisoni</i> Cresson           | Arizona, USA                | T. Sillett       | 014 | DQ788065 |                       |                       |                       |          |
|                                                       |                                    | Utah, USA                   | T. Griswold      | 196 |          | DQ788240              | DQ788350              | DQ788468              | EF050880 |
|                                                       |                                    | Himachal Pradesh, India     | M. Saini         | 249 | DQ787970 | EF032369              | EF032387              | EF032406              | EF050896 |
| <b>Sb</b> <i>Sibiricobombus</i> Vogt<br>(5/4)         | <i>niveatus</i> Kriechbaumer       | Kayseri Prov., Turkey       | PR <i>et al.</i> | 093 | DQ788070 | DQ788244              | DQ788353              | DQ788472              | EF050893 |
|                                                       | <i>sibiricus</i> (Fabricius)       | Khovsgöl Nuur, Mongolia     | D. Sheppard      | 274 | EF032348 | EF032370              | EF032388              | EF032407              | EF050897 |
|                                                       | <i>sulfureus</i> Friese            | Kayseri Prov., Turkey       | PR <i>et al.</i> | 064 | DQ788111 | DQ788283              | AY739492 <sup>H</sup> | DQ788504              | EF050895 |
|                                                       | <i>vorticostus</i> Gerstaecker*    | Aksaray Prov., Turkey       | PR <i>et al.</i> | 124 | DQ788132 | DQ788300              | DQ788384              | DQ788518              | EF050894 |
|                                                       |                                    | Utah, USA                   | T. Griswold      | 145 | DQ787965 | DQ788148              | DQ788314              | DQ788395              | EF050986 |
| <b>St</b> <i>Subterraneobombus</i><br>Vogt (9/7)      | <i>borealis</i> Kirby              | Maine, USA                  | SC, JW           | 250 | DQ787981 | AF492976 <sup>K</sup> | AF493043 <sup>K</sup> | AF492909 <sup>K</sup> | EF050987 |
|                                                       | <i>difficillimus</i> Skorikov*     | Hongyuan, Sichuan, China    | SC <i>et al.</i> | 154 | DQ787998 | DQ788177              | DQ788327              | DQ788417              | EF050990 |
|                                                       | <i>distinguentus</i> Morawitz ♂    | Edesbecka, Finland          | C. Grinter       | 197 | DQ787999 | DQ788180              | DQ788328              | DQ788420              | EF050988 |
|                                                       | <i>fragrans</i> (Pallas)           | Kayseri Prov., Turkey       | PR <i>et al.</i> | 061 | DQ788012 | DQ788191              | DQ788333              | DQ788430              | EF050992 |
|                                                       | <i>melanurus</i> Lepeletier        | Dzungarskij Alatau, Kazakh. | M. Hauser        | 022 | DQ788056 | DQ788230              | AF492990 <sup>K</sup> | AF492856 <sup>K</sup> | EF050991 |
|                                                       | <i>personatus</i> Smith            | Hongyuan, Sichuan, China    | SC <i>et al.</i> | 138 | DQ788081 | DQ788256              | DQ788359              | DQ788481              | EF050993 |
|                                                       | <i>subterraneus</i> (Linnaeus)     | Uppland Co., Sweden         | B. Cederberg     | 046 | DQ788109 | DQ788281              | AF493027 <sup>K</sup> | AF492893 <sup>K</sup> | EF050989 |
|                                                       |                                    | Primorskiy Krai, Russia     | K. Holston       | 147 | DQ787997 | DQ788176              | DQ788326              | AY267170 <sup>K</sup> | EF050922 |
|                                                       |                                    | Hongyuan, Sichuan, China    | SC <i>et al.</i> | 206 | DQ788008 | DQ788188              | DQ788331              | DQ788428              | EF050933 |
|                                                       |                                    | Qionglai Sh, Sichuan, China | SC <i>et al.</i> | 129 | DQ788023 | DQ788199              | DQ788338              | DQ788437              | EF050930 |
| <b>Th</b> <i>Thoracobombus</i> Dalla<br>Torre (19/16) | <i>honshuensis</i> (Tkalčú)        |                             |                  |     |          | AF493029 <sup>K</sup> | AF492962 <sup>K</sup> |                       |          |
|                                                       | <i>humilis</i> Illiger             | E. Pyrenees, France         | HH, PR           | 056 | DQ788026 | DQ788202              | AY739469 <sup>H</sup> | DQ788439              | EF050924 |
|                                                       | <i>impetuosus</i> Smith            | Xinmian, Sichuan, China     | P. Williams.     | 284 | EF032350 | EF032373              | EF032391              | EF032409              | EF050927 |
|                                                       | <i>mlokosievitzii</i> Radoszkowski | Artvin Prov., Turkey        | PR <i>et al.</i> | 081 | DQ788061 | DQ788235              | DQ788349              | DQ788463              | EF050917 |
|                                                       |                                    |                             |                  |     |          |                       |                       |                       |          |



|                  |                                               |                             |                  |     |                       |                       |                       |                       |          |  |
|------------------|-----------------------------------------------|-----------------------------|------------------|-----|-----------------------|-----------------------|-----------------------|-----------------------|----------|--|
|                  | <i>muscorum</i> (Linnaeus)                    | Öland Co., Sweden           | B. Cederberg     | 033 | DQ788067              | DQ788241              | DQ788351              | DQ788469              | EF050925 |  |
|                  | <i>pascuorum</i> (Scopoli)                    | Toscana, Italy              | SC, JW           | 023 | DQ788077              | DQ788251              | AF493001 <sup>K</sup> | AY492867 <sup>K</sup> | EF050932 |  |
|                  | <i>potanini</i> Morawitz*                     | Hongyuan, Sichuan, China    | SC <i>et al.</i> | 113 | DQ788086              | DQ788260              | DQ788362              | DQ788485              | EF050928 |  |
|                  | <i>pseudobaicalensis</i> Vogt                 | Primorskiy Kray, Russia     | K. Holston       | 253 | EF032357              | EF032372              | AY267155 <sup>K</sup> | AY267171 <sup>K</sup> | EF050923 |  |
|                  | <i>remotus</i> Tkalcü♂                        | Qionglai Sh, Sichuan, China | SC <i>et al.</i> | 192 | DQ788092              | DQ788265              | DQ788365              | DQ788490              | EF050929 |  |
|                  | <i>ruderarius</i> (Müller)                    | Obergurgl, Austria          | SC, JW           | 047 | DQ788095              | AF492932 <sup>K</sup> | AF492999 <sup>K</sup> | AF492865 <sup>K</sup> | EF050920 |  |
|                  | <i>schrencki</i> Morawitz♂                    | W. Khentey, N. Mongolia     | M. Mühlenberg    | 298 | AF364828 <sup>B</sup> | AF492933 <sup>K</sup> | AF493000 <sup>K</sup> | AF492866 <sup>K</sup> | EF050931 |  |
|                  | <i>sylvanum</i> (Linnaeus)                    | Uppsala Co., Sweden         | SC, JW           | 110 | DQ788114              | DQ788285              | DQ788376              | DQ788506              | EF050918 |  |
|                  | <i>velox</i> (Skorikov)*                      | Artvin Prov., Turkey        | PR <i>et al.</i> | 094 | DQ788127              | DQ788296              | DQ788381              | DQ788514              | EF050921 |  |
|                  | <i>veteranus</i> (Fabricius)                  | Jura, France                | A. Scholl        | 187 | DQ788129              | DQ788298              | DQ788382              | DQ788516              | EF050919 |  |
|                  | <i>zonatus</i> Smith                          | Aksaray Prov., Turkey       | PR <i>et al.</i> | 063 | DQ788138              | DQ788306              | DQ788386              | DQ788522              | EF050926 |  |
| <b>Tr</b>        | <i>Tricornibombus</i>                         | Zhejiang Prov., China       | P. Meihua        | 066 | DQ787971              | DQ788153              | DQ788316              | DQ788399              | EF050964 |  |
|                  | <i>Skorikov</i> (3/3)                         | Guizhou Prov., China        | M. Yun           | 028 | DQ788032              | DQ788208              | DQ788339              | DQ788441              | EF050965 |  |
|                  |                                               | Primorskiy Kray, Russia     | K. Holston       | 148 | DQ788121              | AF492937 <sup>K</sup> | AF493004 <sup>K</sup> | AF492870 <sup>K</sup> | EF050963 |  |
|                  |                                               |                             |                  |     |                       |                       |                       |                       |          |  |
| <b>OUTGROUPS</b> |                                               |                             |                  |     |                       |                       |                       |                       |          |  |
| <b>Tribe</b>     |                                               |                             |                  |     |                       |                       |                       |                       |          |  |
| <i>Apini</i>     |                                               |                             |                  |     |                       |                       |                       |                       |          |  |
|                  | <i>Apis dorsata</i> Fabricius                 | Bangalore, India            | S. Cameron       | 321 | L22893 <sup>C2</sup>  | AY267146 <sup>K</sup> | AF091733 <sup>M</sup> | AY267178 <sup>K</sup> | EF051028 |  |
|                  | <i>Apis mellifera</i> Linnaeus                | Arkansas, USA               | S. Cameron       | 320 | L22891                | AF015267 <sup>D</sup> | AF091732 <sup>M</sup> | EF032397              | EF051030 |  |
|                  | <i>Euglossa imperialis</i> Cockerell          | São Paulo, Brazil           | S. Cameron       | 319 | AJ581085 <sup>M</sup> | AY267144 <sup>K</sup> | AY267160 <sup>K</sup> | AY267176 <sup>K</sup> |          |  |
|                  | <i>Eulaema boliviensis</i> (Friese)           | La Paz Prov., Bolivia       | M. Hauser        | 213 | DQ788139              | DQ788307              | DQ788387              | DQ788523              | EF051029 |  |
|                  | <i>Geniotrigona thoracica</i> Smith           | Kuala Muda, Malaysia        | R. Hepburn       | 303 | DQ788140              | DQ788308              | DQ788388              | DQ788524              | EF051023 |  |
|                  | <i>Heterotrigona itama</i> Cockerell          | Kuala Muda, Malaysia        | R. Hepburn       | 304 | DQ788141              | DQ788309              | DQ788389              | DQ788525              | EF051024 |  |
|                  | <i>Hypotrigona gribodoi</i> (Magretti)        | Bwindi, Uganda              | R. Kajobe        | 322 | DQ790440 <sup>R</sup> | DQ813121 <sup>R</sup> | DQ813199 <sup>R</sup> | DQ813043 <sup>R</sup> | EF051026 |  |
|                  | <i>Liotrigona mahafalya</i> Brooks & Michener | Mahajanga Prov., Madagascar | B. Fisher        |     | DQ790442 <sup>R</sup> | DQ813126 <sup>R</sup> | DQ813204 <sup>R</sup> | DQ813048 <sup>R</sup> |          |  |
|                  | <i>Plebeia frontalis</i> Friese               | Puebla, Mexico              | M. Villamar      | 323 | DQ790459 <sup>R</sup> | DQ813138 <sup>R</sup> | DQ813216 <sup>R</sup> | DQ813059 <sup>R</sup> | EF051027 |  |
|                  | <i>Trigona amazonensis</i> Ducke              | Madre de Dios, Peru         | S. Cameron       | 178 | DQ788142              | DQ788310              | DQ788390              | DQ788526              | EF051025 |  |

The two-letter acronym (in **bold**) in column 1 denotes the abbreviated subgeneric name. Numbers in parentheses following subgeneric names refer to total number of species recognized by Williams (1998) (excluding extinct species) followed by the number represented in the present study. Asterisks indicate taxa that were recognized as conspecific with other species by Williams (1998). Superscript letters following accession numbers indicate sequences obtained from previous studies. <sup>a</sup>Bae *et al.*, unpubl. GenBank reference, 2001; <sup>c</sup>Cameron & Williams (2003); <sup>e2</sup>Cameron (1993); <sup>D</sup>Danforth & Ji (2001); <sup>H</sup>Hines *et al.* (2006); <sup>K</sup>Kawakita *et al.* (2003, 2004); <sup>M</sup>Mardulyn & Cameron (1999); <sup>M</sup>Michel-Salzat, Cameron & Oliveira (2004); <sup>R</sup>Rasmussen & Cameron, 2007.

HH, PR = H. Hines, P. Rasmont; SC *et al.* = S. Cameron, P. Williams, J. Whitfield; PR *et al.* = P. Rasmont, M. Aytekin, H. Hines, M. Terzo, I. Barbier; SC, JW = S. Cameron, J. Whitfield; RA, RB = R. Ayala, R. Brooks.

## GENES

Five genes were selected for analysis based on prior testing for useful signal: mitochondrial 16S rRNA, and the nuclear protein-encoding genes long-wavelength rhodopsin copy 1 (opsin), elongation factor-1 alpha F2 copy (EF-1 $\alpha$ ), arginine kinase (ArgK) and phosphoenolpyruvate carboxykinase (PEPCK). 16S was selected for its high evolutionary rate, useful for resolving tip relationships; the nuclear genes provide better phylogenetic signal at deeper hierarchical levels in the phylogeny. A full discussion of the first four genes, primer sequences, and rationale underlying their selection is provided elsewhere (Hines *et al.*, 2006). PEPCK was selected because it has recovered relationships within Lepidoptera at similar taxonomic levels to those in *Bombus* (Friedlander *et al.*, 1996) and contains both highly variable intron and conserved exon regions. PEPCK primers used for most taxa were FHv4-5'-TGTATRATAATTCGCAAYTTAC-3' and RHv4-5'-CTGCTGGRGTYCTAGATCC-3'. Some taxa required an alternative forward primer, either FH2-5'-GTSTCTTATGGGAGSGGTTACGG-3' or FHv5-5'-AGAACAATTATCTYAAAATRCTAARCTTC-3'. The forward primer sequences began within an intron and were unable to amplify some of the outgroup taxa. For these and two problematic *Bombus* taxa (*Bombus haematurus* and *Bombus pressus*), primers were designed to amplify only the exon region: PEPCKexF-5'-GATAYTGGCTATCACARATCC-3' and 21dNrc from Friedlander *et al.* (1996). Some previously reported sequences were obtained from GenBank (Table 1). Two of these were renamed to conform to current species names, deduced from their collection locality: *Bombus parthenius* from Taiwan is recognized as *Bombus sonani* and *Bombus nevadensis* from the eastern USA is recognized as *Bombus auricomus*.

## MORPHOLOGY

We analysed an updated version of the morphological data set of Williams (1994), incorporating 47 bumble bee taxa scored for 53 morphological characters, including character states of the male genitalia (30 characters), male soma (seven characters) and female soma (16 characters) (Appendices 1 and 2). Each subgenus is represented by one or two exemplars, which express the character state for the remainder of the subgenus; variable subgenera were represented by more than one species. Because genitalic characters of Apini and Meliponini used in the molecular analyses were difficult to homologize with Bombini, the next closest outgroup, Euglossini (*Eufriesea*), was selected, along with the slightly more distant Xylocopinae (*Lestis*).

## POLYMERASE CHAIN REACTION (PCR) AND DNA SEQUENCING

Detailed extraction, PCR and sequencing protocols are reported in Hines *et al.* (2006). PCR amplification of PEPCK was conducted at annealing temperatures of 49–50 °C and extension at 72 °C. Gene fragments of the following sizes were amplified: (1) ~530 nucleotides (bp) of 16S; (2) ~680 bp of opsin, including two introns comprising 178 bp (Mardulyn & Cameron, 1999); (3) ~725 bp of EF-1 $\alpha$  F2 copy, containing an intron of ~200 bp; (4) ~910 bp of ArgK containing an intron of ~325 bp; and (5) ~900 bp of PEPCK containing two introns of ~525 bp. Sequences obtained from these fragments, using the Applied Biosystems BigDye Terminator kit version 3.0 or 3.1, were visualized with an ABI 3730XL automated sequencer at the W. M. Keck Center for Comparative and Functional Genomics, University of Illinois. Both strands were sequenced for all taxa and consensus sequences were deposited in GenBank (accession numbers are shown in Table 1).

## ALIGNMENT

Sequences were edited and aligned (default parameters, CLUSTAL W) in BioEdit (version 5.0.9) (Hall, 1999), with some manual adjustment if identical or highly similar regions were aligned differently across taxa. A comparative check on the 16S alignment was made using CLUSTAL X, version 1.81 (Jeanmougin *et al.*, 1998), with gap opening of 10 and gap extension of 0.10. Nucleotides of uncertain alignment for 16S (~50 bp from four hypervariable AT-rich regions) were excluded from the data matrices. ArgK and PEPCK contained a few indels that were problematic to align for a few taxa; the ambiguous regions for these were treated as missing data, as in Kawakita *et al.* (2003). Nucleotides of EF-1 $\alpha$  that varied between our taxa and those of Kawakita *et al.* (2003) were confirmed by reinspection of chromatograms. Gap regions of unambiguous alignment were coded as separate binary characters following the methods of Simmons & Ochoterena (2000) and Simmons, Ochoterena & Carr (2001), incorporating only the regions that were parsimony informative in collective analyses. With the introduction of gaps in the alignments, individual gene fragments had the following numbers of aligned/gap-coded sites: 16S, 573/8; opsin, 751/5; EF-1 $\alpha$ , 906/13; ArgK, 1108/43; and PEPCK, 1425/57. The combined (five-genes) data set included 4763 bp and 126 gap-coded characters.

## PHYLOGENETIC ANALYSES

*DNA sequences*

Inter- and intrasubgeneric relationships of *Bombus* were inferred largely from Bayesian analyses,

implemented in MrBayes, version 3.1.2 (Ronquist & Huelsenbeck, 2003) on an IBM p-series 690 supercomputer operated by the National Center for Supercomputing Applications (University of Illinois at Urbana-Champaign, Champaign, IL). Genes were analysed individually and collectively, each partitioned into exon, intron and gap regions (when applicable) to account for variation in evolutionary rates among gene regions. Four taxa sequenced only for the 16S fragment (*Bombus tunicatus*, *Bombus wilemani*, *Bombus coreanus*, and *B. luteipes*) were excluded from collective analyses.

Model selection for each gene was based on Akaike information criteria in Modeltest, version 3.7 (Posada & Crandall, 1998) and MrModeltest (Nylander, 2004). The model parameters used for each gene partition were: 16S (GTR + I + G), 16S gap characters (standard + G); EF-1 $\alpha$  intron (GTR + I + G), EF-1 $\alpha$  exon (GTR + I + G), EF-1 $\alpha$  gap characters (standard + G); opsin intron (GTR + I + G), opsin exon (HKY + G), opsin gap characters (standard + G); ArgK intron (GTR + G), ArgK exon (GTR + I + G), ArgK gap characters (standard + G); PEPCK intron (GTR + G), PEPCK exon (HKY + G) and PEPCK gap characters (standard + G). In combined analyses, gap-coded characters were treated as a single partition (standard + G).

Four to six independent analyses were carried out for each gene fragment and for the combined data (eight million generations for individual genes, 12 million for combined analyses, four chains with mixed-models, flat priors, saving trees every 1000 generations). Consensus trees were estimated from at least three independent analyses, with convergent log-likelihood plots examined in Tracer 1.2 (Rambaut & Drummond, 2003). All trees estimated prior to stationarity were discarded. Trees remaining after convergence from replicate runs were combined to create a single majority rule consensus tree. Posterior probability (PP) values represent the proportion of all Markov chain samples that contain a given node, and are interpreted as the probability that a node or monophyletic group is correct given the model and the data.

To assess the influence of the gap regions on tree topology, additional parallel analyses were conducted with gap-coded characters excluded.

Maximum parsimony nonparametric bootstrap analysis of the combined five-genes data [heuristic search, 300 replicates, ten random additions per replicate, retaining a maximum of 300 trees in each replicate, tree-bisection-reconnection (TBR) branch swapping] was implemented in PAUP\*4.0 (Swofford, 2001) to compare parsimony bootstrap values with Bayesian posterior probabilities. Correspondingly high values for these two different measures of support provide good confidence for testing the monophyly

of the conventional *Bombus* subgenera and accepting other monophyletic groups.

#### Morphological data

Morphological characters were analysed under parsimony in PAUP\* (heuristic search, 100 replicates with a maximum of 500 trees saved per replicate, TBR branch-swapping, all characters of equal weight). Because male genitalic characters have been the focus in prior examinations of *Bombus* phylogeny (Williams, 1985, 1994), we separated the morphological characters into two partitions, one with the full set of characters, the other with only genitalic characters. Replicate analyses established that tree topology and tree statistics were stable. Nonparametric bootstrapping (heuristic search: 100 replicates, ten random additions per replicate, maximum of 500 trees saved per replicate) provided measures of relative support for each node in the parsimony tree.

Morphological characters were also combined with a reduced five-genes data set of the 47 *Bombus* taxa analysed under parsimony, implemented in MrBayes (two independent runs, three million generations, four chains, saving trees every 1000 generations, flat priors, mixed models using the same parameters as those applied to the total sequence data set, standard model applied to the morphological characters). Results were compared with those from a Bayesian analysis of the reduced five-genes data set alone (same model parameters and conditions as applied to genes + morphology). Outgroups for this analysis were selected from the full-scale molecular data set (*Plebeia*, *Trigona*, *Heterotrigona*, *Apis*, and *Eulaema*; Table 1), coded as missing data for the morphological characters.

## RESULTS

### RESOLUTION AND SUPPORT FOR THE PHYLOGENY

Independent Bayesian analyses of each nuclear gene data set resulted in highly resolved and well supported phylogenies overall (supplementary trees online). On the whole, opsin was less useful near the tips of the phylogeny but resolved many of the deeper clades, whereas EF-1 $\alpha$ , ArgK, and PEPCK provided good resolution and support for relationships within and between clades throughout the trees. By contrast, mitochondrial 16S (supplementary tree online) was especially useful in resolving the tip clades within conventional groupings (subgenera) but generally poor at resolving intersubgeneric and deeper relationships (Table 2).

Simultaneous Bayesian analysis of the combined sequence data produced a tree with nearly complete resolution and high branch support at all levels

**Table 2.** The left half of the table indicates resolution (number of internal nodes resolved) and node support (*PP* = posterior probability) for the conventional *Bombus* subgenera from Bayesian analyses of the combined sequences from five genes. In the right half of the table, posterior probability values are reported for subgeneric monophyly based on individual gene sequences. Abbreviations of subgeneric names are given in Table 1. The 12 monotypic subgenera (Table 1) are not listed, nor are subgenera comprising two species for which we have only one representative (Br, Fn, Ob, Rf). u, unresolved; pa, paraphyletic; po, polyphyletic

| Subgenus | Number of taxa in study | Number of internal nodes resolved in combined gene tree | Number of nodes <i>PP</i> ≥ 0.95 in combined gene tree | <i>PP</i> support for monophyly of subgenera |       |      |       |       |
|----------|-------------------------|---------------------------------------------------------|--------------------------------------------------------|----------------------------------------------|-------|------|-------|-------|
|          |                         |                                                         |                                                        | 16S                                          | Opsin | ArgK | Ef-1α | PEPCK |
| Pr       | 46                      | 42                                                      | 28                                                     | u                                            | 1.0   | 1.0  | 1.0   | 1.0   |
| Bo       | 13                      | 10                                                      | 4                                                      | 1.0                                          | 1.0   | 1.0  | 1.0   | 1.0   |
| Al       | 5                       | 4                                                       | 4                                                      | u                                            | 1.0   | 1.0  | 1.0   | 1.0   |
| Rb       | 7                       | 6                                                       | 5                                                      | 1.0                                          | 1.0   | 0.86 | 1.0   | 1.0   |
| Cc       | 2                       | 1                                                       | 1                                                      | 0.87                                         | 1.0   | 1.0  | 0.98  | 1.0   |
| Sp       | 2                       | 0                                                       | 0                                                      | u                                            | u     | u    | u     | u     |
| Ds       | 2                       | 0                                                       | 0                                                      | u                                            | po    | po   | po    | po    |
| Cu       | 3                       | 1                                                       | 1                                                      | 0.99                                         | u     | pa   | u     | u     |
| MI       | 12                      | 11                                                      | 10                                                     | 1.0                                          | 0.89  | 1.0  | 1.0   | 0.91  |
| Ag       | 5                       | 4                                                       | 4                                                      | u                                            | 0.85  | 1.0  | 1.0   | 1.0   |
| Sb       | 5                       | 4                                                       | 3                                                      | u                                            | 0.99  | 0.84 | 1.0   | 0.98  |
| Fv*      | 19                      | 17                                                      | 15                                                     | u                                            | 1.0   | 0.97 | u     | 1.0   |
| Tr       | 3                       | 1                                                       | 1                                                      | po                                           | u     | pa   | u     | po    |
| Rh       | 3                       | 2                                                       | 2                                                      | 1.0                                          | 1.0   | 0.88 | 1.0   | 1.0   |
| Th       | 18                      | 15                                                      | 11                                                     | 1.0                                          | u     | 1.0  | 1.0   | 1.0   |
| Ps       | 20                      | 19                                                      | 17                                                     | 1.0                                          | 1.0   | 1.0  | 1.0   | 1.0   |
| Mg       | 12                      | 11                                                      | 9                                                      | u                                            | 0.94  | 1.0  | 1.0   | 0.78  |
| Sx       | 2                       | 1                                                       | 1                                                      | 1.0                                          | 0.98  | 1.0  | 1.0   | 1.0   |
| Dv       | 4                       | 2                                                       | 1                                                      | 1.0                                          | 1.0   | 1.0  | 1.0   | 1.0   |
| St       | 8                       | 7                                                       | 5                                                      | 1.0                                          | 0.98  | 1.0  | 1.0   | 1.0   |
| Or       | 2                       | 1                                                       | 1                                                      | 1.0                                          | 1.0   | 1.0  | 1.0   | 1.0   |
| Bi       | 2                       | 1                                                       | 1                                                      | 1.0                                          | 1.0   | 1.0  | 1.0   | 1.0   |
| Md       | 7                       | 6                                                       | 5                                                      | 1.0                                          | 1.0   | 1.0  | 1.0   | 1.0   |

\**Fervidobombus* minus the *dahlbomii* + *morio* + *excellens* group.

(Fig. 1, Table 2). Of the 204 *Bombus* nodes in the tree, all but 12 were resolved and 158 (77%) were supported by posterior probability values > 0.95. Relationships among subgenera indicated by high support (*PP* > 0.95) are summarized in Fig. 2.

#### SUBGENERIC RELATIONSHIPS

The Bayesian combined (Fig. 1) and individual nuclear gene phylogenies, and to some extent the 16S phylogeny, indicated strong support for all but the following five conventional *Bombus* subgenera (Table 2): *Separatobombus*, *Dasybombus*, *Cullumanobombus*, *Fervidobombus*, and *Tricornibombus*. Of the three larger nonmonophyletic subgenera, *Cullumanobombus* was paraphyletic as *Bombus rufocinctus* fell out as sister group to the remaining *Cullumanobombus* species (*Bombus apollineus* + *Bombus semenoviellus*) + a New World clade (Fig. 1). *Fervidobombus* emerged as

polyphyletic as the group (*Bombus morio* + *Bombus excellens* + *Bombus dahlbomii*) separated and attached to the *Thoracobombus*–*Rhodobombus* clade (*PP* = 0.81), leaving the remaining *Fervidobombus* strongly supported (*PP* = 1.0). In turn, a polyphyletic *Tricornibombus*, which excluded *Bombus (Tricornibombus) imitator*, and included *Bombus (Exilobombus) exil* (*PP* = 1.0), attached as sister group to *Fervidobombus* (minus the *dahlbomii*-group) with strong support (*PP* = 1.0). Of the remaining two non-monophyletic subgenera (both ditopic), *Separatobombus* was unresolved due to poor support (Fig. 1), and *Dasybombus* was polyphyletic as *Bombus (Dasybombus) macgregori* and *Bombus (Dasybombus) handlirschi* fell into different well supported clades (both with *PP* = 1.0). Two other ditopic subgenera represented in this study by both species (*Coccineobombus* and *Bombias*) were resolved as strongly monophyletic (*PP* = 1.0).

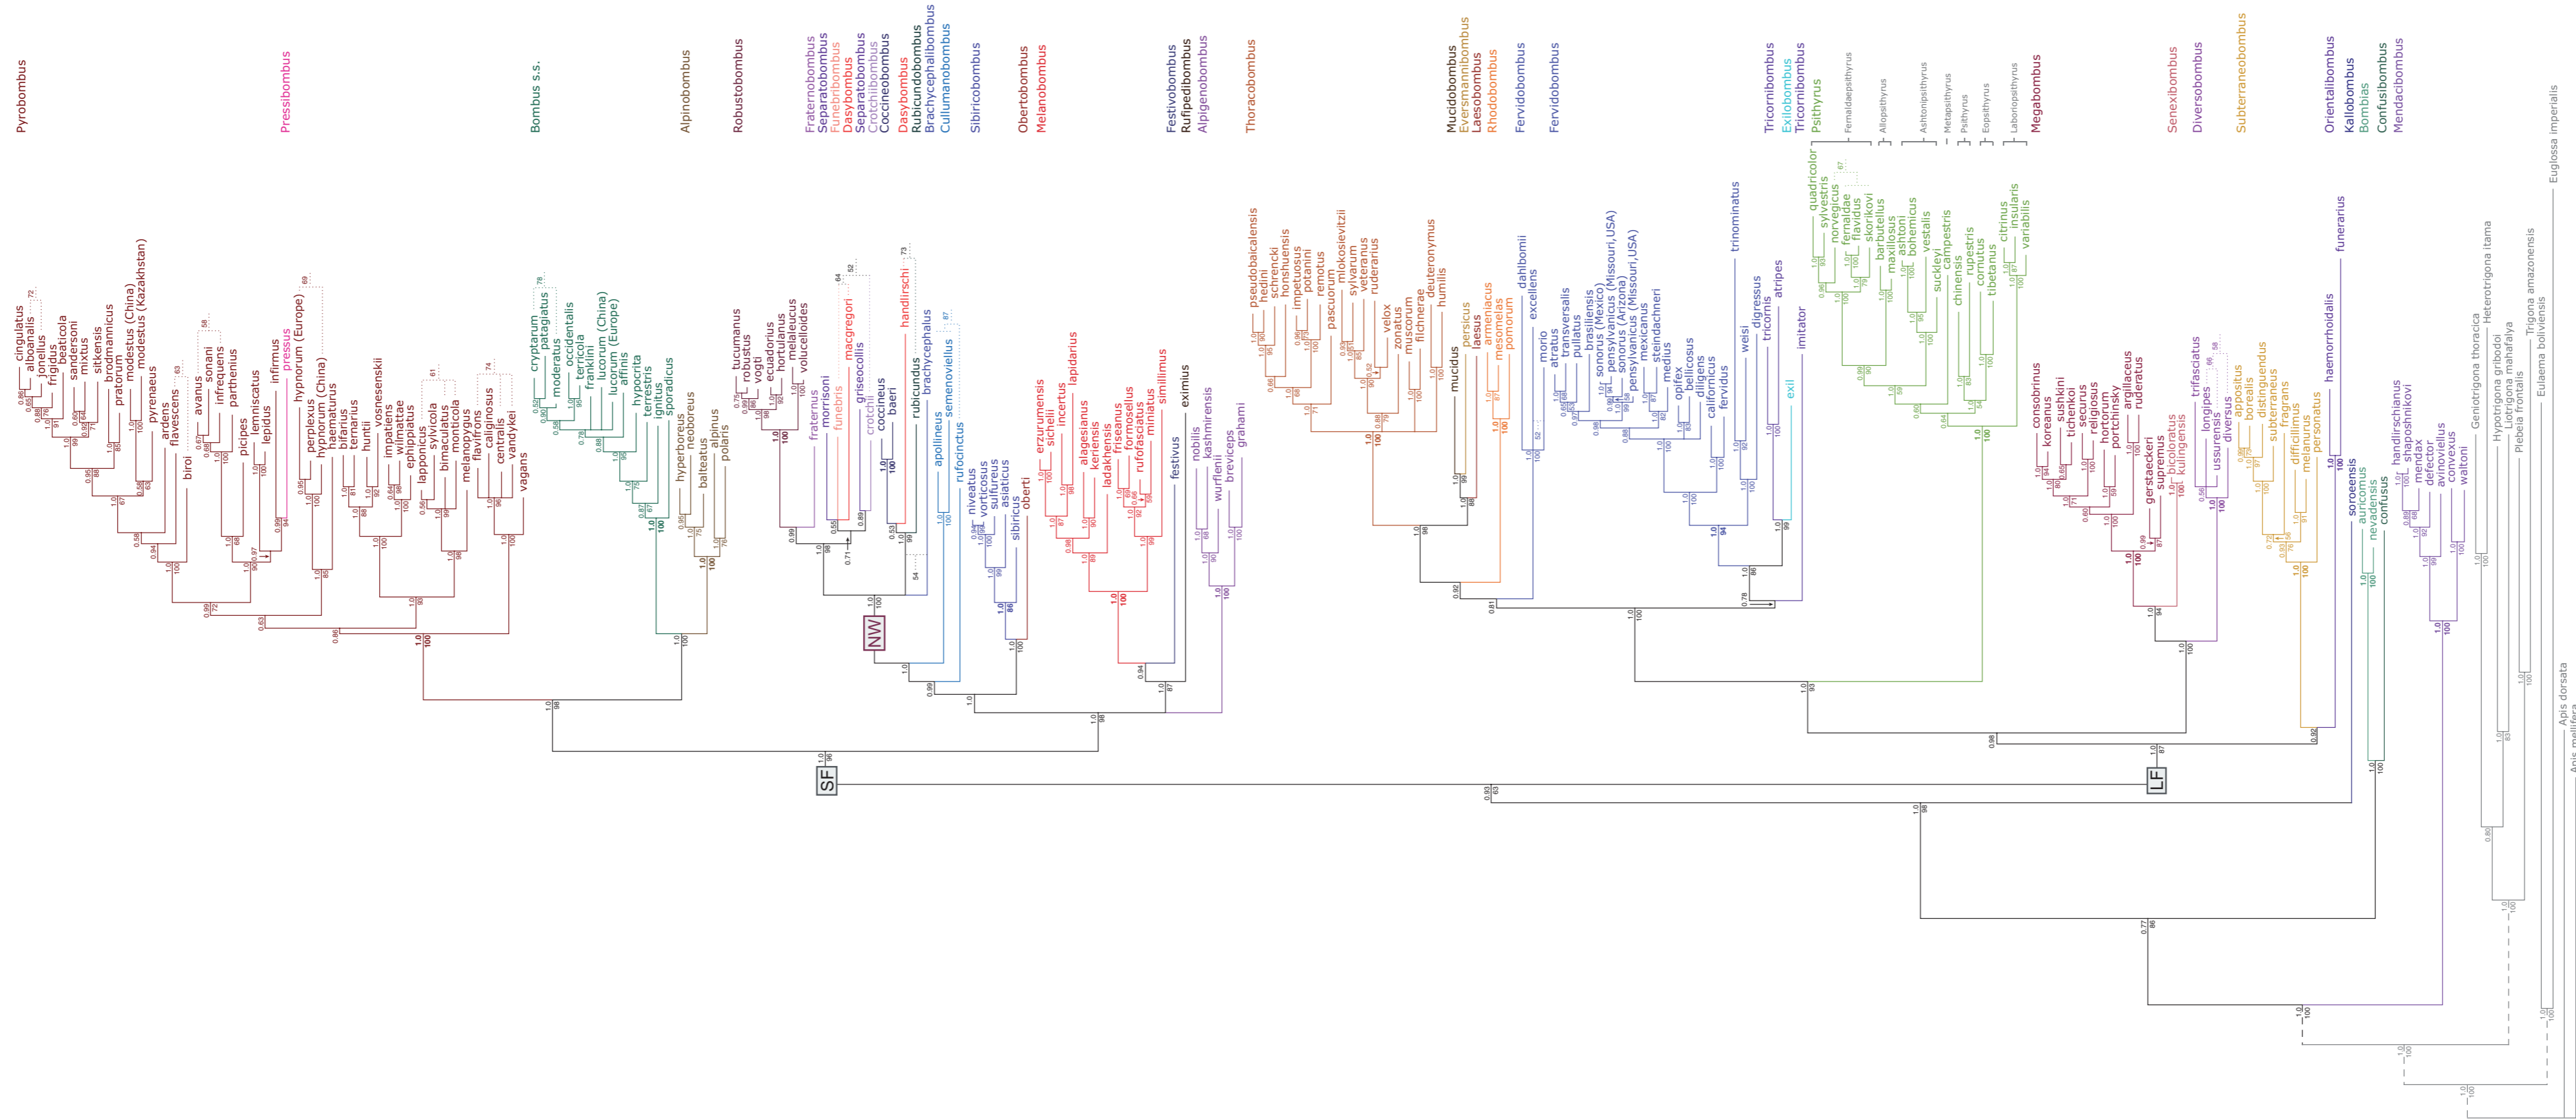

**Figure 1.** Phylogeny of *Bombus* estimated from Bayesian analysis of combined sequence data from five gene fragments (16S, opsin, ArgK, EF-1 $\alpha$ , and PPPCK). Subgeneric clades are individually colour-coded and labelled with the subgeneric name. Values above branches are Bayesian posterior probabilities; values below branches are parsimony bootstrap values. Alternative resolution from parsimony analysis shown as dotted lines. Outgroup branches (in grey), represented by dashed lines, have been shortened for visual purposes. NW, *New World* clade; SF, *short-faced* clade; LF, *long-faced* clade.

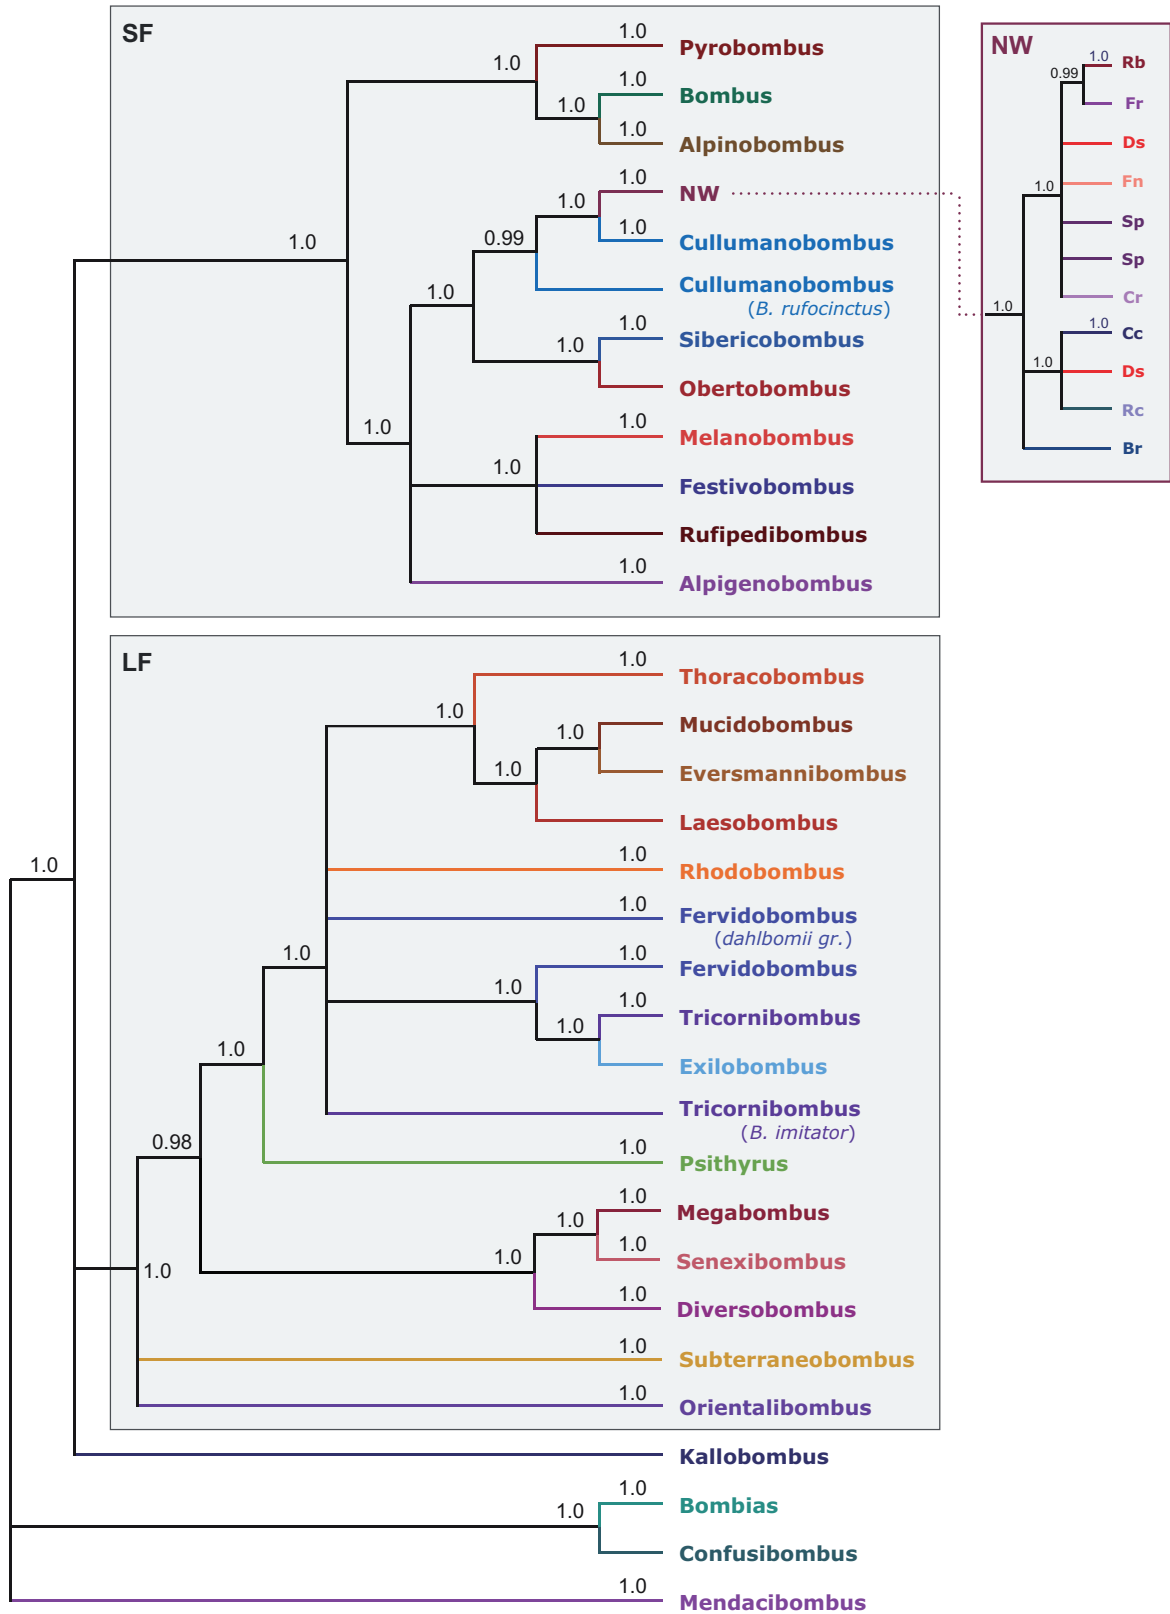

Downloaded from <https://academic.oup.com/biolinnean/article/91/1/161/2701082> by guest on 19 April 2024

**Figure 2.** *Bombus* phylogeny representing only the subgeneric relationships with strong support ( $PP = 0.95$ ) from the Bayesian tree in Fig. 1. Branches are colour-coded as in Fig. 1. Values on branches are Bayesian posterior probability values.

**Table 3.** Synopsis of the closest relatives of each of the 11 conventional monotypic subgenera of *Bombus*

| Subgenus                                      | Sister group relationship                                                   | PP value/BV |
|-----------------------------------------------|-----------------------------------------------------------------------------|-------------|
| <i>Pressibombus</i>                           | Pe + <i>Bombus</i> (Pr) <i>infirmus</i>                                     | 0.99/94     |
| <i>Fraternobombus</i>                         | Fr + Rb                                                                     | 0.99/–      |
| <i>Crotchiibombus</i>                         | Cr + <i>Bombus</i> (Sp) <i>griseocollis</i>                                 | 0.89/–      |
| <i>Rubicundobombus</i>                        | Rc + Cc + <i>Bombus</i> (Ds) <i>handlirschi</i>                             | 1.0/99      |
| <i>Festivobombus</i>                          | Fs + Ml                                                                     | 0.94/–      |
| <i>Mucidobombus</i> / <i>Eversmannibombus</i> | (Mc + Ev) + Ls                                                              | 1.0/88      |
| <i>Laesobombus</i>                            | ((Mc + Ev) + Ls) + Th                                                       | 1.0/98      |
| <i>Exilobombus</i>                            | Ex + ( <i>Bombus</i> (Tr) <i>atripes</i> + <i>Bombus</i> <i>tricornis</i> ) | 1.0/99      |
| <i>Kallobombus</i>                            | Kl + LF + SF                                                                | 1.0/98      |
| <i>Confusibombus</i>                          | Cf + Bi                                                                     | 1.0/100     |

The sister group relationships are inferred from combined DNA sequences of 16S, EF-1 $\alpha$ , opsin, and ArgK. Abbreviated subgeneric names in column 2 are given in Table 1.

PP, posterior probability; BV, parsimony bootstrap value; –, no support.

Of the 11 recognized monotypic subgenera (Table 1), most of their relationships to other taxa were well resolved with good support (Figs 1, 2). Notably, the attachment of *Exilobombus* (*B. exil*) within *Tricornibombus* was strongly supported ( $PP = 1.0$ ), as was the placement of *Pressibombus* (= *B. pressus*) as sister to *Bombus infirmus* within *Pyrobombus* ( $PP = 0.99$ ; Fig. 1). Sister group relationships of the monotypic subgenera are summarized in Table 3.

The four species sequenced only for the 16S fragment were resolved in the 16S tree within their expected subgenera. In particular, *B. luteipes* fell within the *Pyrobombus* clade (*Bombus avanus* + *B. sonani* + *Bombus infrequens* + *B. parthenius*) ( $PP = 0.90$ ), attaching to *B. infrequens* + *B. parthenius* as an unresolved trichotomy ( $PP = 0.97$ ); *B. tunicatus* attached as sister to *Bombus terricola* ( $PP = 0.74$ ); *B. coreanus* was sister to *Bombus ashtoni* + *Bombus bohemicus* ( $PP = 0.85$ ); and *B. wilemani* was sister to *Bombus trifasciatus* ( $PP = 1.0$ ).

Parsimony nonparametric bootstrap analysis of the combined sequences resulted in a tree nearly identical to but somewhat less resolved than the Bayesian tree [Fig. 1, bootstrap values (BV) shown below branches]. The only substantive contradiction was *Cullumanobombus*, which was monophyletic in the parsimony tree (BV = 87%) but paraphyletic in the Bayesian tree ( $PP = 0.99$ ). Parsimony resulted in decreased resolution within portions of *Pyrobombus*, *Bombus s.s.*, *Psithyrus*, and *Fervidobombus*, principally for relationships that were poorly supported with Bayesian analysis. Inconsistencies between parsimony and Bayesian support values (Fig. 1) also occurred near a few of the tip taxa within several subgenera, where posterior probability values were generally low ( $PP = 0.65$ ). Parsimony gave stronger support for the

hypothesis that *Mendacibombus* falls nearest the root (BV = 86%).

#### DEEP RELATIONSHIPS

The individual nuclear- and combined-genes phylogenies resolved nearly all subgenera into two large and strongly supported sister clades (Figs 1, 2), *short-faced* (SF) and *long-faced* (LF), which broadly correspond to differences in facial morphology and ecologically important differences in tongue-length, with some exceptions. ArgK (Fig. 3D) gave somewhat weaker support for SF ( $PP = 0.83$ ) and opsin (Fig. 3C) did not fully resolve it, whereas PEPCK did not fully resolve the LF clade (Fig. 3E). However, the sister group relationship between SF + LF, with or without *Kallobombus*, was supported in all nuclear gene analyses (Fig. 3B–E).

Nested within the *short-faced* clade was a large, well supported group consisting of taxa found exclusively in the New World, including *Robustobombus* and numerous mono- and ditypic subgenera (Figs 1, 2). Eight of the 19 mono- and ditypic subgenera fell into this *New World* (NW) clade, which was also strongly supported in the individual gene trees, except 16S. The subgeneric tree (Fig. 2, inset) shows clearly that the *New World* clade has poorer resolution among subgenera than any other part of the tree.

Although the nuclear gene trees were generally compatible, uncertainty surrounded both the root and the placement of the monotypic *Kallobombus* (Kl) with respect to the *short-* and *long-faced* clades. A consensus of the basal relationships for the five genes (Fig. 3A) summarizes the uncertainty. *Kallobombus* in the EF-1 $\alpha$  tree (Fig. 3B) formed a trichotomy with the *short-* and *long-faced* clades whereas, in the opsin tree,

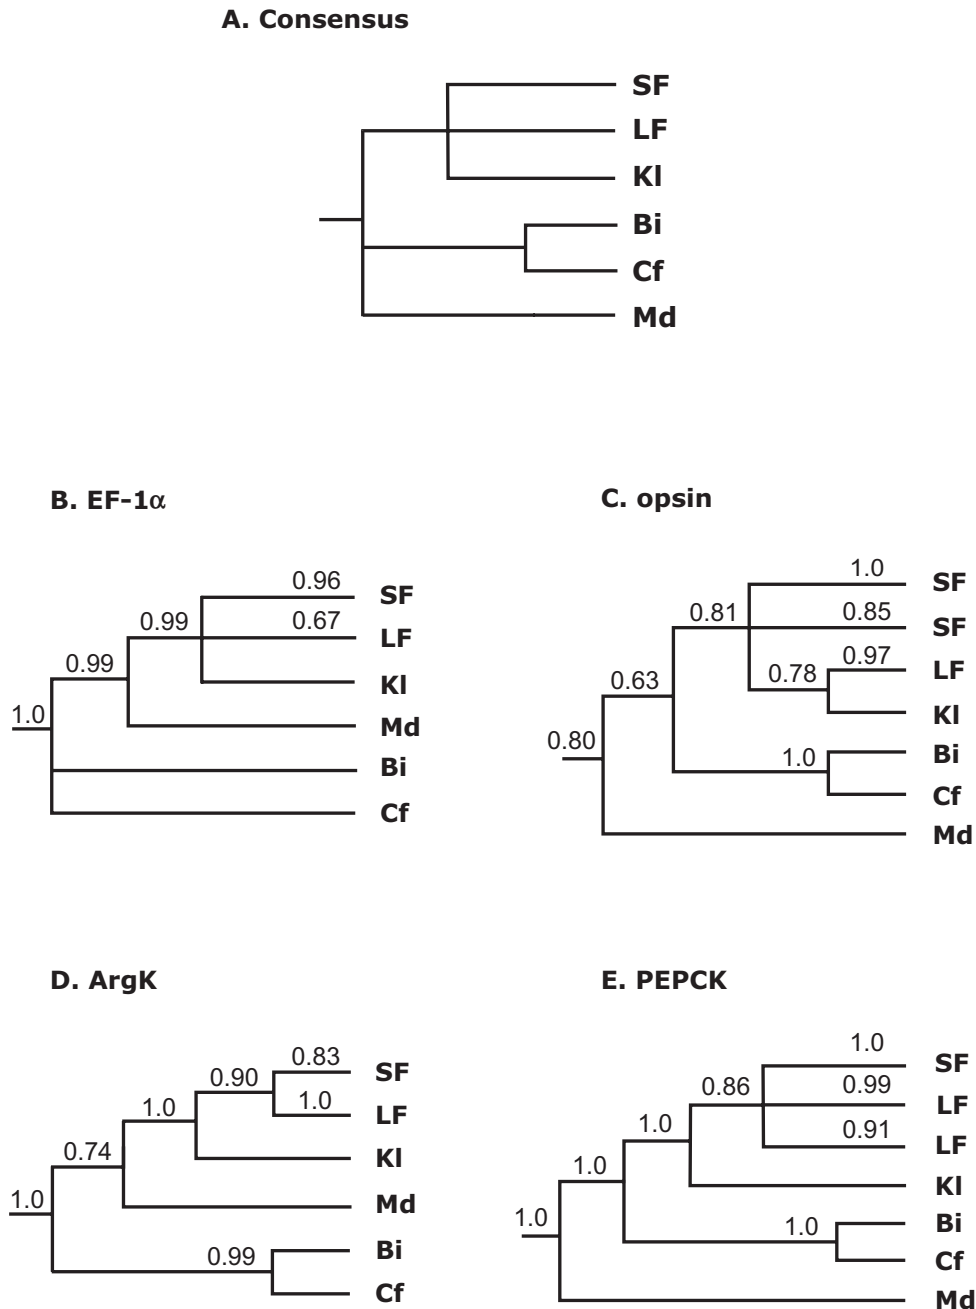

**Figure 3.** *Bombus* trees summarizing the basal relationships for each of four nuclear genes. A, summary consensus of the four individual gene trees: EF-1 $\alpha$  (B), opsin (C), ArgK (D), and PEPCK (E). KI, *Kallobombus*; Bi, *Bombias*; Cf, *Confusibombus*; Md, *Mendacibombus*. SF and LF refer to the *short-faced* and *long-faced* clades, respectively. Proportions shown on the branches of individual gene trees are Bayesian posterior probabilities.

it was more closely related to the *long-faced* clade (Fig. 3C) and, with ArgK and PEPCK, it was sister to SF + LF (Fig. 3D, E). In the combined-genes analysis, *Kallobombus* was resolved as sister to SF + LF with moderate support ( $PP = 0.93$ ,  $BV = 63\%$ ). With respect to rooting the *Bombus* tree, opsin and PEPCK suggested a rooting along the *Mendacibombus* branch

(Fig. 3C, E), although support from opsin was poor ( $PP = 0.63$ ), and EF-1 $\alpha$  and ArgK indicated a rooting with *Confusibombus* + *Bombias* ( $PP = 0.99$  and  $0.74$ , respectively). EF-1 $\alpha$  did not resolve the sister group relationship between *Bombias* + *Confusibombus*, which was strongly supported by all the other genes ( $PP = 0.98$ – $1.0$ ). The combined analysis (Fig. 1) sug-



gested *Mendacibombus* as sister group to the remaining bumble bees, with weak to moderate support ( $PP = 0.77$ ,  $BV = 86\%$ ).

#### EFFECTS OF GAP-CODED CHARACTERS

Excluding the gap-coded characters from the five-genes data set had minor influences on tree topology overall and support values were highly similar to the complete data set. In a few cases, gap characters substantially increased support for a clade, including (1) the sister group relationship between *B. rufocinctus* and members of the *New World* clade + (*B. semenoviellus* + *B. apollineus*) ( $PP = 0.65$  without gaps,  $0.99$  with gaps); (2) the sister group relationship between *Bombus citrinus* and *Bombus insularis* within *Psithyrus* (from  $0.90$  to  $1.0$ ); and (3) the sister group relationship between (*Megabombus* + *Senexibombus* + *Diversobombus*) and *Thoracobombus*–*Psithyrus* (from  $0.91$  to  $0.98$ ). By contrast, gap characters substantially decreased support for the relationship between *Bombus velox* and *Bombus ruderarius* (within *Thoracobombus*) from  $0.99$  to  $0.52$ . Regarding topological changes, excluding the gap characters caused the *Bombus hypnorum*–*B. haematurus* group within *Pyrobombus* (Fig. 1) to attach as sister to the clade *Bombus cingulatus*–*B. biroi* ( $PP = 0.62$ ), and within *Alpinobombus* (Fig. 1), *Bombus balteatus* attached as sister to *Bombus hyperboreus* in place of *Bombus neoboreus* ( $PP = 0.94$ ). Most importantly, excluding gap characters shifted the position of the root from *Mendacibombus* to *Bombias* + *Confusibombus* ( $PP = 0.61$ ).

#### MORPHOLOGY

Figure 4 illustrates comparative results of parsimony bootstrap analyses based on the complete set of morphological characters (Fig. 4A) and on the male genitalia alone (Fig. 4B), with bootstrap values indicating support for nodes > 50%. Genitalic characters alone resulted in higher tree resolution than when somatic characters were included, although support for the additional resolution was weak. Both data sets recovered a *New World* clade + *Sibiricobombus* but bootstrap support was < 50% with the inclusion of somatic characters. The genitalic data resolved a *short-faced* clade, with weak support ( $BV = 59\%$ ), and there was no resolution of a *long-faced* clade in either tree. The trichotomy *Senexibombus* + *Diversobombus* + *Megabombus* was well supported in both trees ( $BV = 83\%$  and  $78\%$ ). Five of the nine subgenera represented by two exemplars in the complete data set were recovered with good support ( $BV > 70\%$ ), only three were supported by genitalia alone. The basal divergences resembled the comprehensive DNA tree

(Figs 1, 2), except that *Mendacibombus* was paraphyletic and *Bombias* and *Confusibombus* did not form a clade.

Bayesian analysis of the sequence data for these 47 taxa recovered a tree (not shown) entirely consistent with the subgeneric relationships from the all-taxon Bayesian analysis (Fig. 2), with nearly identical high support values (all but a few  $PP = 0.98$ ). Adding the morphological characters to the 47-taxon sequence data resulted in decreased support for *Subterraneobombus* + *Orientalibombus* (from  $PP = 0.92$  to  $0.85$ ) and for the placement *Kallobombus* as sister to the *short-faced* + *long-faced* clades (from  $PP = 0.94$  to  $0.68$ ). Also, *Alpigenobombus* moved from its position as an unresolved polytomy with the clades circumscribing the *New World* taxa–*Sibiricobombus* and *Melanobombus*–*Rufipedibombus* to that of sister to these two clades, although support was weak ( $PP = 0.85$ ).

## DISCUSSION

### MONOPHYLY OF CONVENTIONAL SUBGENERA

An unequivocal result of this molecular phylogenetic examination is the strong support that it provides for groups of species represented by the conventional subgeneric system, as developed over many years from morphological taxonomy (Radoszkowski, 1884; Vogt, 1911; Krüger, 1917; Skorikov, 1922; Frison, 1927; Richards, 1968; summarized in Williams, 1998). This is consistent with the more limited molecular analyses of Pedersen (2002) and Kawakita *et al.* (2004). In retrospect, the long stability of the *Bombus* subgenera is notable given the intense controversies over their higher-level classification (for a review, see Ito, 1985). Clearly, characters of the male genitalia (Radoszkowski, 1884; Vogt, 1911; Richards, 1968; Williams, 1985, 1994) have proven reliable indicators of species-group membership (see also Hines *et al.*, 2006).

The problems generally arise when these same characters are used to assess relationships among the subgenera. On the whole, morphological characters, whether analysed phenetically (Plowright & Stephen, 1973; Ito, 1985) or cladistically (Williams, 1985, 1994; Ito & Sakagami, 1985), have been unable to fully resolve the intersubgeneric relationships or to reconstruct higher-level clades that are congruent with the DNA-based phylogeny. Although finding morphological characters that can serve as synapomorphies for higher-level groupings of *Bombus* could be useful, another approach to the study of morphology would make use of the well-resolved DNA phylogeny to elucidate the evolution of functionally interesting morphological traits, such as features of the male genitalia, the tongue, and colour pattern.

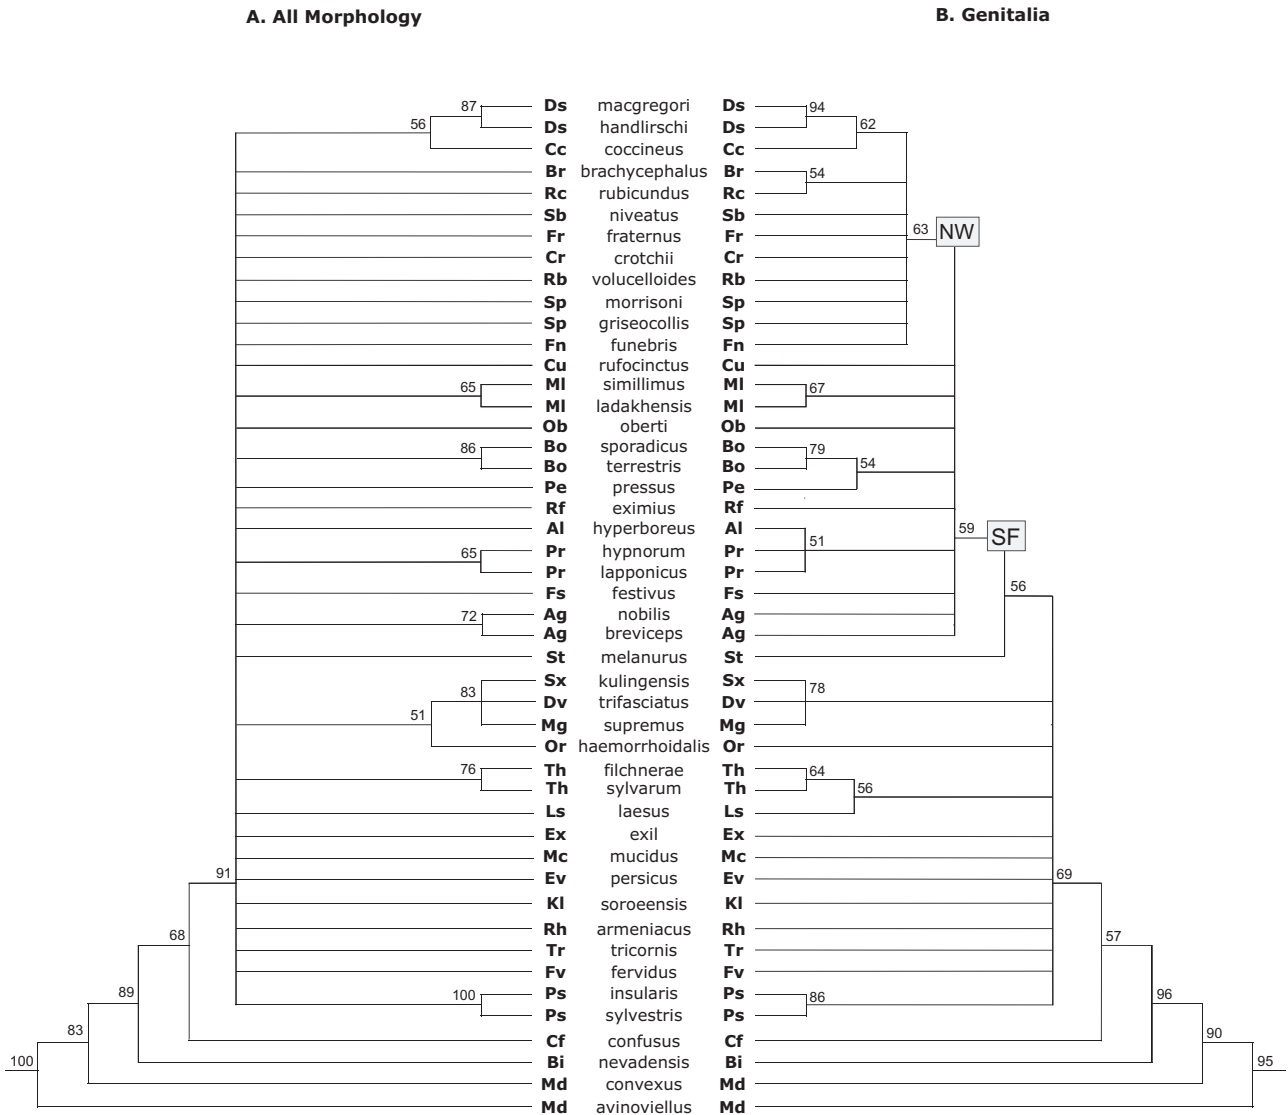

**Figure 4.** Nonparametric parsimony bootstrap trees estimated from morphological characters for 47 *Bombus* subgeneric exemplars. A, analysis of the total morphology data set. B, analysis of genitalic characters alone. Values above branches indicate bootstrap support (BV) > 50%. Subgeneric taxon labels are given in Table 1.

In a few cases, our results lead to the splitting of conventional subgenera. The large subgenus *Fervidobombus* is a conspicuous example, as the *dahlbomii*-group (Fig. 1) falls outside this clade, leaving behind a strongly supported clade attached to a polyphyletic *Tricornibombus*. The polyphyly of *Fervidobombus* was suggested in earlier phenetic (Ito, 1985) and cladistic analyses of subgeneric relationships (Koulianos & Schmid-Hempel, 2000; Kawakita *et al.*, 2003). The report by Cameron & Williams (2003), rooting *Fervidobombus* with *Thoracobombus* (thought to be among its closest relatives), produced an apparently monophyletic clade because other subgenera were not represented in the analysis. More

complete taxon sampling outside *Fervidobombus* updates this.

Williams (1998) assigned *B. handlirschi* to the monotypic *Dasybombus* (Labougle & Ayala, 1985) based on similarities of the male genitalia, but the DNA data show that *B. handlirschi* is closely related to *Rubicundobombus* (*sensu* Franklin, 1912, 1913) and *Coccineobombus* (Fig. 1). The two remaining occurrences of nonmonophyly of subgenera (*Cullumanobombus* and *Separatobombus*) are less clear cut in terms of support, and would benefit from targeted studies of those groups.

In one of the more surprising results, it appears that *Pressibombus* is a part of *Pyrobombus*. Morphologi-

cally, *B. pressus* is characterized by distinctive male genitalia, particularly by a strong reduction of the gonostylus, which appears to a lesser extent in other members of the *parthenius*-group, and by a unique ventrolateral production of the head of the penis valve. Apart from this new addition to the group, *Pyrobombus*, the largest subgenus, is decisively monophyletic (for additional discussion, see Hines *et al.*, 2006). In contrast to earlier reports by Williams (1991, 1994, 1998) suggesting that *Mendacibombus* is paraphyletic and *Sibiricobombus sensu* Richards (1968) (which included *Obertobombus*) is polyphyletic, both groups are monophyletic and, from the single species studied here, *Obertobombus* indeed forms a monophyletic group with *Sibiricobombus*. The monotypic *Festivobombus* and *Rufipedibombus* form a strongly supported group with the larger *Melanobombus*.

The socially parasitic subgenus *Psithyrus* has provoked a great deal of taxonomic controversy. Historically, *Psithyrus* was considered a separate genus of bumble bees (Lepeletier, 1832) because of the divergent biology and morphology associated with its inquiline mode of life. Our results strongly support *Psithyrus* as a monophyletic group within *Bombus*, which is consistent with the majority of findings over the last few decades (Plowright & Stephen, 1973; Pekkarinen *et al.*, 1979; Ito, 1985; Williams, 1985, 1991, 1994; Pamilo *et al.*, 1987; Pedersen, 2002; Kawakita *et al.*, 2004). Furthermore, *Psithyrus* divides into the same clades (Fig. 1) established as subgenera in earlier taxonomic studies (Franklin, 1912, 1913; Frison, 1927; Popov, 1931; Pittioni, 1949). Williams (1991, 1998) treated these as species groups, synonymizing the subgeneric names; Rasmont *et al.* (1995) considered them as separate subgenera within *Bombus*. The relationships among these species groups receive weaker support, highlighting the consistency in relative degree of support between the molecular and morphological data.

Of potential interest to *Psithyrus* evolution is the finding by Bromham & Leys (2005) that rates of molecular evolution in social parasites are faster than those of their social relatives. If this conclusion is accepted, and if substitution rates are expected to evolve in a lineage-dependent fashion, it follows that the socially parasitic *Psithyrus* should exhibit faster rates than most of their social relatives. There may be a hint of this in the greater combined branch lengths of *Psithyrus* relative to the other subgenera, but testing this requires sister-group comparison of substitution rates in their non-parasitic sister taxa.

#### DEEP DIVISIONS WITHIN *BOMBUS*

Krüger (1917) recognized a division of the bumble bees into two larger sections, *Odontobombus* ('with

spine') and *Anodontobombus* ('without spine'), based on several diagnostic morphological characters, including head shape and presence/absence of a mid-basitarsal spine. His *Odontobombus* (*Thoracobombus*, *Laesobombus*, *Mucidobombus*, *Rhodobombus*, *Subterraneanobombus*, and *Megabombus*) and *Anodontobombus* (*Pyrobombus*, *Bombus s.s.*, *Alpinobombus*, *Cullumanobombus*, *Melanobombus*, *Kallobombus*, *Confusibombus*, and *Mendacibombus*) correspond approximately to our *long-faced* and *short-faced* clades. In detail, the *long-faced* clade includes an additional eight subgenera (Fig. 1) not included in Krüger's more restricted investigation of Central European fauna, and the *short-faced* clade includes 13 subgenera omitted by Krüger. Krüger's characters led him to group *Kallobombus*, *Confusibombus*, and *Mendacibombus* within the equivalent of the *short-faced* clade, whereas our results reveal that these taxa fall outside both divisions, representing more basal divergences in the phylogeny. Kawakita *et al.* (2004) discussed two higher-level *Bombus* groupings (clades A and B), which are consistent with our *long-faced* and *short-faced* divisions, but with many fewer taxa and weak support for their A clade. Interestingly, with Bayesian analysis of sequences from only 47 (~20%) of the 218 taxa collected for this study, we recovered the identical structure to that of the comprehensive tree, with well supported intersubgeneric relationships, including the *short-faced*, *long-faced*, and *New World* subdivisions. This indicates that taxon sampling is less important in recovering higher level phylogenetic structure of *Bombus* than is the availability of a large number of informative characters.

#### RELATIONSHIPS NEAR THE RANK OF SPECIES

In several cases, sister taxa share such a remarkable degree of sequence similarity that we might ask whether they are conspecific. Given the 1–2 bp differences we commonly see within a gene for many taxon samples, for example, within nuclear genes of heterozygous females or from comparisons of conspecific taxa sequenced both by us and by Kawakita *et al.* (2003), we consider it likely that two nominal taxa are conspecific if they differ by only 1–2 bp across all gene sequences (equivalent to only 0.03–0.05% sequence divergence). Of course, final decisions about species status will require examining the patterns of variation among a broad sampling of individuals.

Several sympatric species pairs exhibit discordant colour patterns yet have virtually identical sequences. For example, *Bombus* (*Sibiricobombus*) *niveatus* (Fig. 1), which is white-banded, and *Bombus vorticosus*, which is yellow-banded, differed by a single nucleotide (ArgK) across all five genes, supporting their status as dimorphic colour forms of the same species.

Williams (1991, 1998) concluded this from morphology and Rasmont *et al.* (2005) from mandibular gland secretions. *Bombus* (*Mendacibombus*) *handlirshianus* (white-band) and *Bombus shaposhnikovii* (yellow-banded) differ by two bases (1 bp 16S, 1 bp PEPCK), and individuals of these two colour forms were even observed to share a common nest entrance at a site in north-east Turkey (H. M. Hines, pers. observ.). Some of these colour dimorphisms may be the result of intraspecific diallelic differences (Owen & Plowright, 1980). The lack of correspondence between colour pattern variation and degree of nucleotide differentiation shows that much remains to be learned about colour pattern evolution, and sets the stage for examining possible adaptive causes, including mimicry.

Some putative allopatric species pairs, also described from distinct colour morphs, may be conspecific. One example involves the two *Senexibombus* species, *Bombus bicoloratus* (Taiwan) and *Bombus kulingensis* (mainland China), which differ by only a single base in both the 16S and PEPCK sequences. Another example includes *Bombus pensylvanicus* from eastern North America and *Bombus sonorus* from western North America: both taxa, which are similar in morphology but variable in colour pattern (Williams, 1998), exhibit signs of introgression as *B. sonorus* from San Luis Potosí, Mexico (an area of sympatry with *B. pensylvanicus*) and *B. sonorus* from Arizona are not monophyletic relative to two *B. pensylvanicus* sequences from Missouri (Fig. 1). Other likely conspecific taxa, questioned by Williams (1998), include *Bombus erzurumensis/Bombus sichelii* (3 bp difference for 16S, 3 bp for EF1 $\alpha$ , 1 bp for PEPCK) and *Bombus voluceloides/Bombus melaleucus* (2 bp 16S, 3 bp ArgK).

In two cases, allopatric pairs of *Psithyrus* taxa exhibit nearly identical sequences and could be conspecific: *Bombus fernaldae/Bombus flavidus* (1 bp difference EF1 $\alpha$ , 1 bp ArgK) and *B. ashtoni/B. bohemicus* (1 bp ArgK). It is unusual that one member of each pair occurs only in the New World and the other only in the Old World, respectively. If conspecific, each pair would encompass a nearly Holarctic temperate distribution, thus far found only in the *lucorum* complex and some *Alpinobombus* species. The possible conspecificity of *B. fernaldae* and *B. flavidus* has not been considered until now, but Williams (1991) suggested that *B. ashtoni* and *B. bohemicus* could be parts of the same species. Both taxa specialize on hosts of the subgenus *Bombus s.s.*: *B. ashtoni* on *Bombus affinis* and *B. terricola* (Plath, 1934; Fisher, 1984), *B. bohemicus* on *Bombus lucorum* (Alford, 1975).

Other species pairs considered potentially conspecific (Williams, 1998) are somewhat genetically divergent based on 16S, including *B. occidentalis/B. terricola* (7 bp, 1.3%); *Bombus fervidus/Bombus californicus* (8 bp, 1.6%); *B. velox/Bombus deuter-*

*onymus* and *Bombus sylvicola/Bombus lapponicus* (10 bp, 1.9%); *B. moderatus + B. cryptarum/B. lucorum* (11 bp, 2.1%, 14 bp, 2.6%; neither taxon is monophyletic with *B. lucorum*); *Bombus alagesianus/Bombus keriensis* (14 bp, 2.6%) and *Bombus difficillimus/Bombus melanurus* (20 bp, 3.8%). The separation of *B. auricomus* and *B. nevadensis* on the basis of morphology, colour pattern (Williams, 1998), and allozymes (Scholl *et al.*, 1992) is also supported by our sequence data (22 bp, 4.2%). Interestingly, *Bombus modestus* from Kazakhstan is genetically distinct from *B. modestus* from Sichuan, China for 16S, exhibiting greater genetic distance (24 bp, 4.5%) than many pairs of sister species.

#### IMPLICATIONS FOR *BOMBUS* CLASSIFICATION

Several authors have suggested that the subgeneric system for bumble bees would benefit from simplification (Menke & Carpenter, 1984; Williams, 1998). The challenge is to recognize monophyletic groups that are morphologically and behaviourally meaningful, while reducing the number of small subgenera. Our *Bombus* phylogeny raises the possibility of revising the classification with more confidence by providing a framework to ensure monophyletic subgenera and reduce the proliferation of formal group names. Here we intend no nomenclatural action as specific recommendations concerning recognition of groups will be made elsewhere, based in part on some of the following relevant details.

Concerning the *New World* clade, rather than recognizing even more monotypic subgenera, it might be more practical to recognize the entire *New World* clade as a single subgenus consisting of several species groups, including *Robustobombus*. Further reductions in numbers of subgenera could be achieved by placing *Obertobombus* (*Bombus oberti*) into *Sibiricobombus*, and by including *Festivobombus* (*Bombus festivus*) and *Rufipedibombus* in *Melanobombus*. Whether to consolidate these taxa into one group is complicated by the fact that many of the monotypic subgenera are sister to clades subtended by conspicuously long branches, suggesting long separation/distinctness (Fig. 1). In view of these apparently large intersubgeneric genetic distances, it might be prudent to consider additional biological characters in decisions as to whether to combine the taxa.

Given the strong support for *Pressibombus* falling within *Pyrobombus*, it is reasonable to synonymize *Pressibombus* under *Pyrobombus*. The clade comprising the monotypic subgenera *Mucidobombus*, *Eversmannibombus*, and *Laesobombus* could be considered as members of *Thoracobombus* or as a separate three-species subgenus. *Exilobombus* attaches to *Tricornibombus* (excluding *B. imitator*) and should be

considered a part of *Tricornibombus*. *Megabombus* could include *Senexibombus*. *Bombias* and *Confusibombus* might be combined into a single subgenus, although the branches appear long and the respective taxa distinct.

New names might be required to accommodate the splitting of a few subgenera. The obvious division of *Fervidobombus* into two monophyletic groups could require a new species group or subgenus designation for *B. dahlbomii* + *B. morio* + *B. excellens*. Other classification decisions may involve *Cullumanobombus*, *Separatobombus*, *Dasybombus*, and *Tricornibombus*.

#### FUTURE RESEARCH

##### *Phylogeny*

Within some clades (e.g., *Bombus* s.s. and *Fervidobombus*), a few of the internodes are short but have high posterior probabilities (Fig. 1). We interpret these relationships with caution because Bayesian inference is highly sensitive to phylogenetic signal (indicating high posterior probability values with relatively few characters) and has been shown (with simulated data) to occasionally attach high support values to incorrect short internodes (Alfaro, Zoller & Lutzoni, 2003). Gathering additional characters should resolve the uncertainties associated with these short branches. Importantly, new characters from other genes should increase resolution and support for relationships within the *New World* clade and strengthen the placement of *Kallobombus* and assignment of the root.

The missing putative species (Williams, 1998) from this study are most notably from *Psithyrus* (eight species), *Mendacibombus* (five species) and *Melanobombus* (four species). Examination of the positions of these and remaining species from small subgenera (e.g., *Cullumanobombus*, *Rufipedibombus*, *Senexibombus*, and *Orientalibombus*) would secure our knowledge of *Bombus* relationships and subgeneric monophyly.

##### *Diversification in the New World*

The pattern of diversification of the *New World* clade, with its numerous distinctive taxa that span North America, Mexico, and the Andes, suggests there may have been at least two episodes of relatively rapid divergence after colonization of the New World. The first of these is implied by the very short branches that subtend relatively long branches of the morphologically distinct monotypic subgenera, which are difficult to resolve with good support (Fig. 1). This pattern poses interesting questions concerning the interplay between colonization of the New World and trends in bumble bee diversification. Comparative studies of sister taxa outside this group, which are all Old World (except *B. rufocinctus*), could reveal

whether any morphological or physiological innovations occurred in association with episodes of continental colonization and diversification (Kay *et al.*, 2005). The second episode occurred with *Robustobombus*, the only speciose monophyletic subgenus within the *New World* clade. This group seems to have diverged more recently in upland areas of the northern Andes, perhaps in association with new ecological opportunities provided after the northern Andean uplift (3–5 Mya) that involved the colonization by new plant genera (Hughes & Eastwood, 2006). Our robust species phylogeny affords the opportunity to test this hypothesis with estimates of divergence times.

The only other large endemic New World subgenus, *Fervidobombus*, suggests a similar pattern of diversification after colonization from the Old World. However, in contrast to taxa of the *New World* clade, many of which inhabit cooler, mountainous habitats, *Fervidobombus* inhabit warmer lowland habitats, including tropical rain forest (Williams, 1985; Cameron & Williams, 2003). Their predisposition to nest above ground, a characteristic of many of their closest Old World relatives, may underlie their mostly lowland distribution, and at least partially explain the innovation in nest architecture associated with the atypical rain forest species, *Bombus transversalis* (Taylor & Cameron, 2003) and *Bombus pullatus* (Hines, Cameron, & Deans, 2007). Additional research on the biology of Old World relatives should clarify influences of ecological shifts and phylogeny on life history of the tropical bumble bees.

##### *Colour pattern evolution*

Colour pattern mimicry in bumble bees has been suggested by several authors (Plowright & Owen, 1980; Williams, 1991) to explain many geographical trends in colour pattern variation. However, conclusions that colour patterns do not also evolve along phylogenetic lineages have been limited by incomplete species sampling and coding of the full range of patterns and intraspecific polymorphisms. Our comprehensive phylogenetic results permit the first comparative examination of convergence and mimicry on a worldwide scale.

#### ACKNOWLEDGEMENTS

First and foremost we thank B. Cederberg and P. Rasmont, without whose collecting and taxonomic assistance this research would have been greatly diminished. We also thank all of those listed in Table 1 for their assistance worldwide in the contribution of fresh material for sequencing; most significantly, we thank R. Ayala, A. M. Aytekin, O. Berg, M. Hauser, R. Hepburn, P. Mardulyn, C. Rasmussen, M. Saini, A.

Scholl, R. Thorp, R. Vandame, and J. Whitfield. We especially thank Chen Xuexin and Tang Ya for their invaluable assistance with organizing the China expedition, Pierre Rasmont for organizing the Turkey expedition, Ricardo Ayala for organizing collecting in Mexico, and Gernot Patzelt for assisting with collecting in the Austrian Alps. We thank Sudhakar Pami-dighantam (UIUC NCSA) for invaluable technical assistance and Ben Grosser and Micah Wolfe for creative assistance with graphics. We are indebted to Jim Whitfield for his careful reading and comments on the manuscript. We also thank Sally Corbet, Charles Michener, and three anonymous reviewers for comments. Lastly, SAC is especially grateful to JBW for sharing in the earliest vision of this research. This research was supported by USDA grants (NRI, CSREES, 2002-35302-11553 and 2004-35302-15077) and NSF grants (DEB 060004) to S.A.C.

## REFERENCES

- Alfaro ME, Zoller S, Lutzoni F. 2003.** Bayes or bootstrap? A simulation study comparing the performance of Bayesian Markov chain Monte Carlo sampling and bootstrapping in assessing phylogenetic confidence. *Molecular Biology and Evolution* **20**: 255–266.
- Alford DV. 1975.** *Bumblebees*. London: Davis-Poynter Limited.
- Bromham L, Leys R. 2005.** Sociality and the rate of molecular evolution. *Molecular Biology and Evolution* **22**: 1393–1402.
- Cameron SA. 1993.** Multiple origins of advanced eusociality in bees inferred from mitochondrial DNA sequences. *Proceedings of the National Academy of Sciences of the United States of America* **90**: 8687–8691.
- Cameron SA. 2003.** Data from the elongation factor-1 $\alpha$  gene corroborates the phylogenetic pattern from other genes revealing common ancestry of bumble bees and stingless bees (Hymenoptera: Apinae). *Proceedings of the III Mesoamerican Seminar on Stingless Bees*. Tapachula, Chiapas: ECOSUR and Universidad Autónoma de Chiapas, 132–136.
- Cameron SA, Jost MC. 1998.** Correlates of dominance status among queens in a cyclically polygynous Neotropical bumble bee. *Insectes Sociaux* **45**: 135–149.
- Cameron SA, Mardulyn P. 2001.** Multiple molecular data sets suggest independent origins of highly eusocial behavior in bees (Hymenoptera: Apinae). *Systematic Biology* **50**: 194–214.
- Cameron SA, Mardulyn P. 2003.** The major opsin gene is useful for inferring higher level phylogenetic relationships of the corbiculate bees. *Molecular Phylogenetics and Evolution* **28**: 610–613.
- Cameron SA, Whitfield JB. 1996.** Use of walking trails by bees. *Nature* **379**: 125.
- Cameron SA, Williams PH. 2003.** Phylogeny of bumble bees in the New World subgenus *Fervidobombus* (Hymenoptera: Apidae): congruence of molecular and morphological data. *Molecular Phylogenetics and Evolution* **28**: 552–563.
- Danforth BN, Ji S. 2001.** Australian *Lasioglossum* + *Homa-*  
*lictus* form a monophyletic group: resolving the ‘Australian enigma’. *Systematic Biology* **50**: 268–283.
- Darwin CR. 1859.** *On the origin of species by means of natural selection*. London: John Murray.
- Dornhaus A, Cameron SA. 2003.** A scientific note on food alert in *Bombus transversalis*. *Apidologie* **34**: 87–88.
- Dornhaus A, Chittka L. 2004.** Information flow and regulation of foraging activity in bumble bees (*Bombus* spp.). *Apidologie* **35**: 183–192.
- Evans DL, Waldbauer GP. 1982.** Behaviour of adult and naïve birds when presented with a bumblebee mimic. *Zeitschrift für Tierpsychologie* **59**: 247–259.
- Fisher RM. 1984.** Evolution and host specificity: a study of the invasion success of a specialized bumblebee social parasite. *Canadian Journal of Zoology* **62**: 1641–1644.
- Franklin HJ. 1912.** The Bombidae of the New World, part I. *Transactions of the American Entomological Society* **38**: 177–486.
- Franklin HJ. 1913.** The Bombidae of the New World, Part II. Species south of the United States. *Transactions of the American Entomological Society* **39**: 73–200.
- Freeman RB. 1968.** Charles Darwin on the routes of male bumble bees. *Bulletin of the British Museum (Natural History) (Historical)* **3**: 179–189.
- Friedlander TP, Regier JC, Mitter C, Wagner DL. 1996.** A nuclear gene for higher level phylogenetics: phosphoenolpyruvate carboxykinase tracks Mesozoic-age divergences within Lepidoptera (Insecta). *Molecular Biology and Evolution* **13**: 594–604.
- Frison TH. 1927.** A contribution to our knowledge of the relationships of the Bremidae of America north of Mexico (Hymenoptera). *Transactions of the American Entomological Society* **53**: 51–78.
- Hall TA. 1999.** BioEdit: a user-friendly biological sequence alignment editor and analysis program for Windows 95/98/NT. *Nucleic Acids Symposium Series* **41**: 95–98.
- Heinrich B. 2004.** *Bumblebee economics (with a new preface)*. Cambridge, MA: Harvard University Press.
- Hines HM, Cameron SA, Deans A. 2007.** Nest architecture and foraging behavior in *Bombus pullatus* (Hymenoptera: Apidae), with comparisons to other tropical bumble bees. *Journal of the Kansas Entomological Society* **80**: 1–15.
- Hines HM, Cameron SA, Williams PH. 2006.** Molecular phylogeny of the bumble bee subgenus *Pyrobombus* (Hymenoptera: Apidae: *Bombus*) with insights into gene utility for lower level analysis. *Invertebrate Systematics* **20**: 289–303.
- Hughes C, Eastwood R. 2006.** Island radiation on a continental scale: exceptional rates of plant diversification after uplift of the Andes. *Proceedings of the National Academy of Sciences of the United States of America* **103**: 10334–10339.
- Ito M. 1985.** Supraspecific classification of bumblebees based on the characters of male genitalia. *Contributions from the Institute of Low Temperature Science, Series B* **20**: 1–143.
- Ito M, Sakagami SF. 1985.** Possible synapomorphies of the parasitic bumblebees (*Psithyrus*) with some nonparasitic bumblebees (*Bombus*) (Hymenoptera: Apidae). *Sociobiology* **10**: 105–119.

- Jeanmougin F, Thompson JD, Gouy M, Higgins DG, Gibson TJ. 1998.** Multiple sequence alignment with Clustal X. *Trends in Biochemical Science* **23**: 403–405.
- Kawakita A, Sota T, Ascher JS, Ito M, Tanaka H, Kato M. 2003.** Evolution and phylogenetic utility of alignment gaps within intron sequences of three nuclear genes in bumble bees (*Bombus*). *Molecular Biology and Evolution* **20**: 87–92.
- Kawakita A, Sota T, Ito M, Ascher JS, Tanaka H, Kato M, Roubik DW. 2004.** Phylogeny, historical biogeography, and character evolution in bumble bees (*Bombus*: Apidae) based on simultaneous analysis of three nuclear gene sequences. *Molecular Phylogenetics and Evolution* **31**: 799–804.
- Kay KM, Reeves PA, Olmstead RG, Schemske DW. 2005.** Rapid speciation and the evolution of hummingbird pollination in neotropical *Costus* subgenus *Costus* (Costaceae): evidence from nrDNA ITS and ETS sequences. *American Journal of Botany* **92**: 1899–1910.
- Koulianos S. 1999.** Phylogenetic relationships of the bumblebee subgenus *Pyrobombus* (Hymenoptera: Apidae) inferred from mitochondrial cytochrome b and cytochrome oxidase I sequences. *Annals of the Entomological Society of America* **92**: 355–358.
- Koulianos S, Schmid-Hempel P. 2000.** Phylogenetic relationships among bumble bees (*Bombus*, Latreille) inferred from mitochondrial cytochrome b and cytochrome oxidase I sequences. *Molecular Phylogenetics and Evolution* **14**: 335–341.
- Krüger E. 1917.** Zur Systematik der mitteleuropäischen Hummeln (Hym.). *Entomologische Mitteilungen* **6**: 55–66.
- Labougle JM, Ayala R. 1985.** A new subgenus and species of *Bombus* (Hymenoptera: Apidae) from Guerrero. *Mexico Folia Entomológica Mexicana* **66**: 47–55.
- Lepeletier de Saint Fargeau ALM. 1832.** Observations sur l'ouvrage intitulé: 'bombi scandinavicae monographice tractato, etc., à Gustav Dahlbom'. *Annales de la Société Entomologique de France* **1**: 366–382.
- Linnaeus C. 1758.** *Systema naturae*, 10th edn. Stockholm.
- Lockhart PJ, Cameron SA. 2001.** Trees for bees. *Trends in Ecology and Systematics* **16**: 84–88.
- Mardulyn P, Cameron SA. 1999.** The major opsin in bees (Insecta: Hymenoptera): a promising nuclear gene for higher level phylogenetics. *Molecular Phylogenetics and Evolution* **12**: 168–176.
- Menke AS, Carpenter J. 1984.** Nuclearbombus, new subgenus (or how to eliminate bumblebee subgenera and learn to love the *Bombus*). *Bulletin of the Entomological Society of Canada* **16**: 130.
- Michel-Salzat A, Cameron SA, Oliveira ML. 2004.** Phylogeny of the orchid bees (Hymenoptera: Apinae: *Euglossini*): DNA and morphology yield equivalent patterns. *Molecular Phylogenetics and Evolution* **32**: 309–323.
- Michener CD. 1990.** Classification of the Apidae (Hymenoptera). *University of Kansas Science Bulletin* **54**: 75–164.
- Milliron HE. 1961.** Revised classification of the bumblebees, a synopsis (Hymenoptera: Apidae). *Journal of the Kansas Entomological Society* **34**: 49–61.
- Milliron HE. 1971.** A monograph of the Western Hemisphere bumblebees (Hymenoptera: Apidae; *Bombinae*). I. The genera *Bombus* and *Megabombus* subgenus *Bombias*. *Memoirs of the Entomological Society of Canada* **82**: 1–80.
- Milliron HE. 1973a.** A monograph of the Western Hemisphere bumblebees (Hymenoptera: Apidae; *Bombinae*). II. The genus *Megabombus* subgenus *Megabombus*. *Memoirs of the Entomological Society of Canada* **89**: 81–237.
- Milliron HE. 1973b.** A monograph of the Western Hemisphere bumblebees (Hymenoptera: Apidae; *Bombinae*). III. The genus *Pyrobombus* subgenus *Cullumanobombus*. *Memoirs of the Entomological Society of Canada* **91**: 238–333.
- Nylander JAA. 2004.** *MrModeltest*, version 2. Available at: <http://www.abc.se/~nylander/>.
- Obrecht E, Scholl A. 1981.** Enzymeelektrophoretische Untersuchungen zur Analyse der Verwandtschaftsgrade zwischen Hummel- und Schmarotzerhummelarten (Apidae, Bombini). *Apidologie* **12**: 257–268.
- Olesen JM. 1989.** Behavior and nest structure of the Amazonian *Bombus transversalis* in Ecuador. *Journal of Tropical Ecology* **5**: 243–246.
- Owen RE, Plowright RC. 1980.** Abdominal pile color dimorphism in the bumble bee, *Bombus melanopygus*. *Journal of Heredity* **71**: 241–247.
- Pamilo P, Pekkarinen A, Varvio S-L. 1987.** Clustering of bumblebee subgenera based on interspecific genetic relationships (Hymenoptera, Apidae: *Bombus* and *Psithyrus*). *Annales Zoologici Fennici* **24**: 19–27.
- Pedersen BV. 1996.** A phylogenetic analysis of cuckoo bumblebees (*Psithyrus*, Lepeletier) and bumblebees (*Bombus*, Latreille) inferred from sequences of the mitochondrial gene cytochrome oxidase I. *Molecular Phylogenetics and Evolution* **5**: 289–297.
- Pedersen BV. 2002.** European bumblebees (Hymenoptera: Bombini) – phylogenetic relationships inferred from DNA sequences. *Insect Systematics and Evolution* **33**: 361–386.
- Pekkarinen A. 1979.** Morphometric, colour and enzyme variation in bumblebees (Hymenoptera, Apidae, *Bombus*) in Fennoscandia and Denmark. *ACTA Zoologica Fennica* **158**: 1–60.
- Pekkarinen A, Varvio-Aho SL, Pamilo P. 1979.** Evolutionary relationships in northern European *Bombus* and *Psithyrus* species (Hymenoptera: Apidae) studied on the basis of allozymes. *Annales Entomologici Fennici* **45**: 77–80.
- Pittioni B. 1949.** Beiträge zur Kenntnis der Bienenfauna SO-Chinas. Die Hummeln und Schmarotzerhummeln der Ausbeute J. Klapperich (1937/38). (Hym., Apoidea, Bombini). *Eos* **2**: 241–284.
- Plath OE. 1934.** *Bumblebees and their ways*. New York, NY: Macmillan Co.
- Plowright RC, Owen RE. 1980.** The evolutionary significance of bumble bee colour patterns: a mimetic interpretation. *Evolution* **34**: 622–637.
- Plowright RC, Stephen WP. 1973.** A numerical taxonomic analysis of the evolutionary relationships of *Bombus* and *Psithyrus* (Apidae: Hymenoptera). *Canadian Entomologist* **105**: 733–743.
- Popov VB. 1931.** Zur Kenntnis der Paläarktischen Schmarotzerhummeln (*Psithyrus* Lep.). *Eos* **7**: 131–209.

- Posada P, Crandall KA. 1998.** Modeltest: testing the model of DNA substitution. *Bioinformatics* **14**: 817–818.
- Radoszkowski O. 1884.** Révision des armures copulatrices des mâles du genre *Bombus*. *Byulletin' Moskovskogo Obshchestva Ispytatelei Prirody* **59**: 51–92.
- Rambaut A, Drummond A. 2003.** *Tracer V1.2 MCMC tracer file analyzer*. Oxford: University of Oxford. Available at <http://evolve.zoo.ox.ac.uk/blast/>.
- Rasmont P, Ebmer PA, Banaszak J, Zanden G. 1995.** van der Hymenoptera Apoidea Gallica. Liste taxonomique des abeilles de France, de Belgique, de Suisse et du Grand-Duché de Luxembourg. *Bulletin de la Société de France* **100**: 1–98.
- Rasmont P, Terzo M, Aytekin AM, Hines H, Urbanova K, Cahlikova L, Valterova I. 2005.** Cephalic secretions of the bumblebee subgenus *Sibiricobombus* Vogt suggest *Bombus niveatus* Kriechbaumer and *Bombus vorticosus* Gerstaecker are conspecific (Hymenoptera, Apidae, Bombus). *Apidologie* **36**: 571–584.
- Rasmussen C, Cameron SA. 2007.** A molecular phylogeny of the Old World stingless bees (Hymenoptera: Apidae: *Meliponini*) and the non-monophyly of the large genus *Trigona*. *Systematic Entomology* **32**: 26–39.
- Reinig WF. 1935.** On the variation of *Bombus lapidarius* L. and its cuckoo, *Psithyrus rupestris* Fabr., with notes on mimetic similarity. *Journal of Genetics* **30**: 321–356.
- Reinig WF. 1939.** Die Evolutionsmechanismen, erläutert an den Hummeln. *Verhandlungen der Deutschen Zoologischen Gesellschaft Supplement* **12**: 170–206.
- Richards OW. 1968.** The subgeneric division of the genus *Bombus* Latrielle (Hymenoptera: Apidae). *Bulletin of the British Museum (Natural History) Entomology* **22**: 209–276.
- Roig-Alsina A, Michener CD. 1993.** Studies of the phylogeny and classification of long-tongued bees (Hymenoptera: Apidae). *University of Kansas Science Bulletin* **55**: 124–162.
- Ronquist F, Huelsenbeck JP. 2003.** MrBayes 3: Bayesian phylogenetic inference under mixed models. *Bioinformatics* **19**: 1572–1574.
- Sakagami SF. 1976.** Specific differences in the bionomic characters of bumblebees: a comparative review. *Journal of the Faculty of Science, Hokkaido University Series VI, Zoology* **20**: 390–447.
- Sakagami SF, Akahira Y, Zucchi R. 1967.** Nest architecture and brood development in a neotropical bumblebee *Bombus atratus*. *Insectes Sociaux* **14**: 389–414.
- Scholl A, Thorp RW, Owen RE, Obrecht E. 1992.** Specific distinctness of *Bombus nevadensis* (Cresson) and *B. auricomus* (Robertson) (Hymenoptera: Apidae) – enzyme electrophoretic data. *Journal of the Kansas Entomological Society* **65**: 134–140.
- Schultz TR, Engel MS, Ascher JS. 2001.** Evidence for the origin of eusociality in the corbiculate bees (Hymenoptera: Apidae). *Journal of the Kansas Entomological Society* **74**: 10–16.
- Simmons MP, Ochoterena H. 2000.** Gaps as characters in sequence-based phylogenetic analyses. *Systematic Biology* **49**: 369–381.
- Simmons MP, Ochoterena H, Carr TG. 2001.** Incorporation, relative homoplasy, and effect of gap characters in sequence-based phylogenetic analyses. *Systematic Biology* **30**: 454–462.
- Skorikov AS. 1922.** [Palaeartic bumble bees. Part I general biology (including zoogeography)]. *Izvestiya Severnoi Oblastnoi Stantsii Zashchity Rastenii Ot Vreditelei* **4**: 1–160.
- Skorikov AS. 1931.** Die Hummelfauna Turkestans und ihre Beziehungen zur zentralasiatischen Fauna (Hymenoptera: Bombidae). *Abhandlungen der Pamir-Expedition 1928* **8**: 175–247.
- Sladen FWL. 1912.** *The humble-bee*. London: Macmillan.
- Swofford DL. 2001.** *PAUP\* phylogenetic analysis using parsimony (\*and other methods)*, Version 4. Sunderland, MA: Sinauer Associates.
- Taylor OM, Cameron SA. 2003.** Nest construction and architecture of the Amazonian bumble bee (Hymenoptera: Apidae). *Apidologie* **34**: 321–331.
- Thompson GJ, Oldroyd BP. 2004.** Evaluating alternative hypotheses for the origin of eusociality in corbiculate bees. *Molecular Phylogenetics and Evolution* **33**: 452–456.
- Thorp R. 2005.** *Bombus franklini* Frison, 1921. Franklin's Bumble Bee (Hymenoptera: Apidae: Apinae: Bombini). In: Shepherd MD, Vaughan DM, Black SH, eds. *Red List of Pollinator Insects of North America*. CO-ROM Version 1 (May 2005). Portland, OR: The Xerces Society for Invertebrate Conservation.
- Tkalců B. 1968.** Revision der vier sympatrischen, homochrome geographische Rassen bildenden Hummelarten SO-Asiens (Hymenoptera, Apoidea, Bombinae). *Annotationes Zoologicae et Botanicae* **52**: 1–31.
- Tkalců B. 1972.** Arguments contre l'interprétation traditionnelle de la phylogénie des abeilles (Hymenoptera, Apoidea). Première partie, introduction et exposés fondamentaux. *Bulletin de la Société Entomologique de Mulhouse* **1972**: 17–28.
- Tkalců B. 1974.** Eine Hummel-Ausbeute aus dem Nepal-Himalaya (Insecta, Hymenoptera, Apoidea, Bombinae). *Senckenbergiana Biologica* **55**: 311–349.
- Tkalců B. 1989.** Neue Taxa asiatischer Hummeln (Hymenoptera, Apoidea). *Acta Entomologica Bohemoslovaca* **86**: 39–60.
- Vogt O. 1911.** Studien über das Artproblem. 1. Mitteilung. Über das Variieren der Hummeln. 2. Teiltly (Schluss). *Sitzungsberichte der Gesellschaft Naturforschender Freunde zu Berlin* **1911**: 31–74.
- Waldbauer GP, Sternberg JG, Maier CT. 1977.** Phenological relationships of wasps, bumblebees, their mimics, and insectivorous birds in an Illinois sand area. *Ecology* **58**: 583–591.
- Williams PH. 1985.** A preliminary cladistic investigation of relationships among the bumble bees (Hymenoptera, Apidae). *Systematic Entomology* **10**: 239–255.
- Williams PH. 1991.** The bumble bees of the Kashmir Himalaya (Hymenoptera: Apidae, Bombini). *Bulletin of the British Museum (Natural History) Entomology* **60**: 1–204.
- Williams PH. 1994.** Phylogenetic relationships among bumble bees (*Bombus* Latr.): a reappraisal of morphological evidence. *Systematic Entomology* **19**: 327–344.
- Williams PH. 1998.** An annotated checklist of bumble bees



with an analysis of patterns of description (Hymenoptera: Apidae, Bombini). *Bulletin of the British Museum (Natural History) Entomology* **67**: 79–152.

**Williams PH. 2007.** The distribution of bumblebee colour patterns world-wide: possible significance for thermoregulation, crypsis, and warning mimicry. *Biological Journal of the Linnean Society* in press.

**Zucchi R. 1973.** Aspectos bionômicos de *Exomalopsis aureopilosa* e *Bombus atratus* incluindo considerações sobre a evolução do comportamento social (Hymenoptera, Apoidea). Doctoral Thesis. Faculdade de Filosofia, Ciências e Letras de Ribeirão Preto.

## APPENDIX 1

The morphological character states represented in the matrix are listed. Multistate characters analysed as ordered are shown with asterisks. Characters of the penis refer to the penis valves unless otherwise specified.

### MALE PENIS

1. Spatha broader than long (0); spatha longer than broad (1).
2. Spatha basally broadly rounded (0); spatha basally acutely pointed (1).
3. Spatha laterally continuous with valves (0); spatha laterally overhanging valves (1).
4. Dorsal lightly sclerotized channel narrow (0); dorsal lightly sclerotized channel broad (1).
5. Shaft without a distinct ventro-lateral angle (0); shaft with an acute ventro-lateral angle near the mid-point of its length (1); shaft with only a weak trace of a ventro-lateral angle (2); shaft with ventro-lateral angle broadly rounded as a shallow convexity (3); shaft with ventro-lateral angle pronounced as a very broadly rounded right angle (4).
6. Shaft dorso-ventrally narrow or irregular in breadth (0); shaft uniformly dorso-ventrally expanded (1).
7. Apex straight or curved outwards (0); apex curved in towards body midline (1).
- 8.\* Head strongly laterally compressed (0); head nearly tubular (1); head strongly dorso-ventrally flattened (2).
- (9) Inner basal shelves broad (0); inner basal shelves narrow (1).
- 10.\* Inner shelves of head absent or weakly defined (0); inner shelves of head strongly marked basally by a pronounced right angle, then running parallel to shaft axis as far as recurved head (1); inner shelves expanded basally (2).
- 11.\* Head with outer shelf narrow (0); head with outer shelf extended laterally by more than the same breadth as head (1); head with outer shelf curved ventrally and then twisted towards apex, to form half of a funnel (2).

12. Head with outer shelf narrow or board (0); head with outer margin of shaft with straight section narrow subapically (1).

13. Head with inner (median) margin of recurved section convex (0); head with inner margin of recurved section concave.

14. Head with or without inwardly recurved hook (0); head straightened with secondary loss of inwardly recurved hook (1).

15. Head without basal ventral projection (0); head with basal ventral projection (1).

16. Shaft nearly straight in lateral aspect (0); shaft with a strong 'S'-shaped dogleg in lateral aspect (1).

### MALE VOLSELLA

17.\* Small irregular sclerite, not extending apically further than gonostylus (0); large clasping organ, extending apically further than gonostylus (1); entire volsella elongated and narrowed (2).

18. Outer margin with long setae (0); outer margin without long setae (1).

19. Lateral margins subapically converging (0); lateral margins broadened immediately subapically and then truncated apically (1).

20. Inner margin without a distinct subapical process (0); inner margin with a subapical process, which is usually toothed, arising just before inner margin and projecting in towards midline of body (1); inner subapical process produced distinctly beyond inner margin, often in the form of a broad curved tongue (2); inner subapical process reduced to an indistinct curve in margin, always lacking teeth (3).

21. Inner subapical process distinctly separated from apex, often nearer midpoint of length (0); inner subapical process narrowly subapical, at least on long axis of volsella.

22.\* Inner ventral ridge not swollen or swelling not curved back proximally towards outer margin (0); inner ventral ridge, near mid-point of volsella length, pronounced at the inner edge of coarsely sculptured area in the apical half and curved back proximally towards the outer margin (1); coarsely sculptured ventral area broadened basally before an inner constriction to a narrower subapical neck, and pear-shaped (2).

23.\* Coarsely sculptured ventral area weakly defined or proximal half reaching outer margin adjacent to gonocoxite (0); proximal half of coarsely sculptured ventral area separated from outer margin by a concave, weakly sculptured area, forming a narrow shining submarginal groove (1); proximal half of coarsely sculptured ventral area separated from outer margin by a concave, weakly sculptured area, forming a submarginal groove as broad as coarsely sculptured area (2); proximal half of coarsely sculptured ventral area separated from margin by broad submarginal groove with long setae (3).

24.\* Inner apical margin without stout setae (0); inner apical margin with stout setae (1); inner apical margin with stout setae very long and dense (2).

#### MALE GONOSTYLUS

25. Inner basal corner without a distinct process (0); inner basal corner with a distinct rounded process projecting in towards midline of body (1); inner basal corner with a distinct process; distally narrowed in the form of a single sharp spine (2); inner basal process with teeth (3).

26. Basal inner margin associated with setae (0); basal inner margin without associated setae (1).

27. Inner basal process produced (0); inner basal process reduced to a stub or membranous or both (1).

28. Inner apical margin simple (0); inner apical margin double with a submarginal groove (1).

29. Apical process present (0); apical process absent (1).

30. Apical process rounded or narrowing (0); apical process broadened (1).

#### MALE HEAD

31. Mandible with sparse long setae from posterior margin (0); mandible with dense setae from posterior margin, forming a 'beard' (1).

32. Antenna short, not reaching back beyond wing bases (0); antenna long, reaching back beyond wing bases (1).

33. Flagellar segments nearly straight and cylindrical (0); flagellar segments curved (1).

34. Compound eye similar in relative size to female eye (0); compound eye distinctly enlarged relative to female eye (1).

#### MALE THORAX

35. Hind tibia with outer surface uniformly convex (0); hind tibia with outer surface partially concave medially in distal third (1).

36. Hind tibia with short or long hairs over entire outer surface (0); hind tibia without even short hairs medially in distal third (1).

#### MALE ABDOMEN

37. Gastral sternum VII with posterior margin medially convex or irregular, but not broadly concave (0); gastral sternum VII with posterior margin medially broadly concave (1).

#### FEMALE HEAD

38.\* Labrum with median longitudinal ridge (0); labrum with complete transverse ridge between two grooves (1); labrum with transverse ridge broadly

interrupted medially (2); labrum with median part of transverse ridge displaced towards apex of labrum to form a projecting lamella, which reaches towards the anterior margin of the labrum (3).

39. Labrum broadly rectangular (0); labrum broadly triangular (1).

40. Mandible distally broadly rounded (0); mandible distally pointed (1).

41. Mandible with two to four teeth (0); mandible with six teeth (1).

42. Mandible with basal keel not reaching distal margin (0); mandible with basal keel reaching distal margin (1).

43. Oculo-malar distance less than the basal breadth of mandible (0); oculo-malar distance equal to or greater than the basal breadth of mandible (1).

44. Oculo-malar area broadly rounded into the face anteriorly, the area below the eye uniformly convex (0); oculo-malar area separated from the face anteriorly by a narrowly rounded angle, the area immediately below the eye partially concave (1).

#### FEMALE THORAX

45.\* Mid-basitarsus with disto-posterior corner broadly rounded or forming a right angle (0); mid-basitarsus with acute disto-posterior corner (1); mid-basitarsus with pronounced disto-posterior spine (2).

46. Hind tibia without corbicula (0); hind tibia with corbicula (1).

47. Hind tibia with disto-posterior corner forming right angle (0); hind tibia with disto-posterior corner acute or spinosely produced (1).

48. Hind basitarsus with proximo-posterior process no longer broad (0); hind basitarsus with proximo-posterior process longer than broad (1).

49. Hind basitarsus with proximal process with few scattered hairs on outer surface (0); hind basitarsus with proximal process densely hairy on outer surface (1).

#### FEMALE ABDOMEN

50.\* Gastral sternum II without transverse ridge (0); gastral sternum II with weakly rounded transverse ridge (1); gastral sternum II with strongly raised transverse ridge (2).

51. Gastral sternum VI without subapical swellings, curving gradually dorsally (0); gastral sternum VI with paired subapical swellings, lateral areas abruptly turned dorsally (1).

52. Gastral sternum VI without lateral keels (0); gastral sternum VI with lateral keels (1).

53. Gastral segments V–VI nearly coaxial with segments I–IV (0); gastral segments V–VI curled ventrally and back towards anterior (1).



## SUPPLEMENTARY MATERIAL

The following supplementary material is available for this article:

**Figure S1.** 16S. Phylogeny of *Bombus* estimated from Bayesian analysis of mitochondrial 16S rRNA nucleotide data. Values above branches are Bayesian posterior probabilities. The left hand portion of the figure connects via the dashed lines at the bottom to the dotted lines at the top of the right hand portion of the figure.

**Figure S2.** EF-1 $\alpha$ . Phylogeny of *Bombus* estimated from Bayesian analysis of elongation factor-1 $\alpha$  F2 copy nucleotide sequences. Values above branches are Bayesian posterior probabilities. The left hand portion of the figure connects via the dashed lines at the bottom to the dotted lines at the top of the right hand portion of the figure.

**Figure S3.** Opsin. Phylogeny of *Bombus* estimated from Bayesian analysis of long-wavelength rhodopsin copy 1 nucleotide sequences. Values above branches are Bayesian posterior probabilities. The left hand portion of the figure connects via the dashed lines at the bottom to the dotted lines at the top of the right hand portion of the figure.

**Figure S4.** ArgK. Phylogeny of *Bombus* estimated from Bayesian analysis of arginine kinase nucleotide sequences. Values above branches are Bayesian posterior probabilities. The left hand portion of the figure connects via the dashed lines at the bottom to the dotted lines at the top of the right hand portion of the figure.

**Figure S5.** PEPCK. Phylogeny of *Bombus* estimated from Bayesian analysis of phosphoenolpyruvate carboxykinase nucleotide sequences. Values above branches are Bayesian posterior probabilities. The left hand portion of the figure connects via the dashed lines at the bottom to the dotted lines at the top of the right hand portion of the figure.

This material is available as part of the online article from:  
<http://www.blackwell-synergy.com/doi/abs/10.1111/j.1095-8312.2007.00784.x>  
(This link will take you to the article abstract).

Please note: Blackwell Publishing are not responsible for the content or functionality of any supplementary materials supplied by the authors. Any queries (other than missing material) should be directed to the corresponding author for the article.
